34 **ABSTRACT**

35 **Importance:** Childhood obesity increases cardiometabolic risk during childhood among individuals aged 2-  
36 18 years. These cardiometabolic outcomes include glucose intolerance, dyslipidemia, hypertension, metabolic  
37 syndrome, and type 2 diabetes (T2D). In the current state of research, a comprehensive review identifying all  
38 early-life exposures and risk factors that could predict cardiometabolic risk in children is lacking.

39 **Objective:** To identify and evaluate the predictive early-life risk factors during the first 1,000 days of life,  
40 including preconception, pregnancy and birth, and early infancy periods for cardiometabolic risk outcomes in  
41 childhood.

42 **Evidence review:** The present systematic review of existing literature was conducted to revise and search  
43 selected electronic databases (Medline, EMBASE, WEB OF SCIENCE, SCOPUS, and Cochrane CENTRAL)  
44 for longitudinal studies published between the database's inception and August <sup>17</sup>, 2022. This systematic review  
45 protocol was registered to PROSPERO, CRD42022355152, and following the PRISMA guidelines. We  
46 selected articles that studied the risk factors in mothers, fathers and infants, from preconception to infancy, for  
47 childhood cardiometabolic outcomes between 2 and 18 years.

48 **Findings:** In 68 studies, we identified 229 associations between exposures and childhood cardiometabolic  
49 outcomes namely glucose intolerance, dyslipidemia, hypertension, metabolic syndrome, and T2D. The  
50 majority of associations (n=162) were positively associated with cardiometabolic risk factors. Pregnancy and  
51 birth risk factors were the categories with the most reported associations (86%). Among them, the most  
52 frequently assessed characteristics were birth anthropometrics (n=75), sociodemographics data (n=47), and  
53 pregnancy complications factors (n=34). However, we only identified few risk factors during preconception.  
54 In infancy period, breastfeeding (n=16) and infant anthropometrics (n=15) were consistently associated with  
55 cardiometabolic outcomes. In all periods, the most studied associations were identified for hypertension and  
56 metabolic syndrome.

57 **Conclusions and relevance:** Birth anthropometrics, sociodemographics, and pregnancy complication factors  
58 were the most frequently reported predictive factors associated with a higher risk for cardiometabolic outcomes  
59 in children, particularly hypertension and metabolic syndrome. These results of this study are useful for  
60 predicting the risk for childhood cardiometabolic outcomes and for the modifiable factors. They also may

61 facilitate the design of approaches aimed at the alteration of several behaviours from birth to infancy,  
62 encompassing both the maternal and paternal influences, as well as the preconception to infancy transition  
63 period. Future studies evaluating early-life risk factors with scarce scientific evidence, such as paternal and  
64 preconception factors, are urgently needed.

## 65 **Key points**

### 66 **Question**

67 What is the existing evidence of early-life risk factors during the first 1000 days of life that are associated with  
68 cardiometabolic dysfunction between 2 and 18 years?

### 69 **Findings**

70 Birth anthropometrics, pregnancy complications, sociodemographics and lifestyle factors are the most  
71 frequently reported associated exposures with hypertension and metabolic syndrome in children.

### 72 **Meaning**

73 Identifying early-life risk factors and changing behavior patterns throughout preconception and infancy can  
74 contribute to prevent metabolic diseases later in childhood.

75

76

77

78

79

80

81

82

83

## 84 INTRODUCTION

85 Obesity increases the risk and severity of several cardiometabolic conditions, such as glucose intolerance,  
86 dyslipidemia, hypertension, metabolic syndrome, and type 2 diabetes (T2D). More than 50% of children and  
87 adolescents with obesity are diagnosed with one cardiometabolic risk condition, and 25% are diagnosed with  
88 two and more cardiometabolic risk conditions <sup>1,2</sup>. The global prevalence of T2D by 2030 is estimated to  
89 increase to 10.2% from 9.3% in 2019 <sup>3</sup>. Furthermore, estimations from 2021 indicate that T2D or its  
90 complications is main cause of death for nearly 7 million people worldwide, leading to an economic cost of  
91 approximately US\$ 966 billion in 2021, which could reach US\$ 1.03 trillion by 2030 and US\$ 1.05 trillion by  
92 2045 <sup>4</sup>. Early-life exposures or risk factors during the preconception period, pregnancy and the early years of  
93 life could lead to the development of cardiometabolic features during childhood <sup>5</sup>. Children rarely suffer  
94 adverse cardiovascular events as those experienced by adults, but cardiovascular and metabolic disease risk  
95 factors may already be present and related to future adult cardiovascular diseases (CVD) development <sup>6,7</sup>,  
96 which are responsible for about 31% of deaths worldwide <sup>8</sup>. Several studies emphasize intrauterine conditions  
97 are an important factors of cardiometabolic risk. In fact, birth weight is a sentinel marker of fetal health,  
98 reflecting both intrauterine growth and length of gestation. Interestingly, both low birth weight (LBW) (2500  
99 g) and high birth weight (HBW) (>4000 g) are linked to cardiometabolic risk factors later in childhood <sup>7</sup>.  
100 Extrauterine growth retardation seems to be also associated with a greater risk of cardiometabolic risk later in  
101 life <sup>9,10</sup>. Several studies have shown that maternal factors might influence cardiometabolic health in children  
102 <sup>11</sup>. Thus, maternal body mass index (BMI) before pregnancy, maternal weight gain during pregnancy,  
103 gestational diabetes, maternal malnutrition, and maternal smoking during pregnancy, are independently  
104 associated with neonatal, infant, and child adiposity, and might impact the development of cardiometabolic  
105 risk factors. In addition, pregnancy complications such as preeclampsia and gestational diabetes also predict  
106 cardiovascular morbidity and mortality, and the cardiometabolic risk is often transmitted to the next generation  
107 <sup>12</sup>. Children who were exposed to gestational diabetes in utero may also be more susceptible to developing  
108 metabolic syndrome, since they have higher systolic blood pressure, BMI, and blood glucose than those who  
109 were not exposed to gestational diabetes <sup>13</sup>. Although there is less information about how paternal factors might  
110 imprint cardiometabolic conditions during childhood, evidence indicates a relevant role for males in affecting

111 cardiometabolic outcomes in their offspring<sup>14</sup>. It has been proven that paternal BMI during preconception  
112 impairs the cardiometabolic profile of children<sup>15-17</sup>.

113 To halt the global rise in cardiometabolic disease, prevention of risk factor development in early life is of key  
114 importance. A suboptimal fetal and postnatal development needs to be addressed as early as possible according  
115 to evidence-based recommendations to prevent the perpetuation of adiposity, which can lead to obesity in  
116 adolescence, adulthood, and subsequent generations<sup>18,19</sup>. Moreover, a better understanding of early life  
117 exposures and risk factors that are associated with an increased cardiometabolic disease risk is crucial.

118 Hence, we conducted this systematic review to determine whether/which early-life exposures result in  
119 increased rates of cardiometabolic comorbidities in children between 2 and 18 years. By analyzing the first  
120 1,000 days of life, we aimed to assess the quality of potential crucial early-life risk factors during  
121 preconception, pregnancy and birth, and early infancy periods for the prediction of children at risk for  
122 cardiometabolic outcomes such as glucose intolerance, dyslipidemia, hypertension, metabolic syndrome, and  
123 T2D.

124

## 125 **METHODS**

### 126 **Systematic review protocol development**

127 This study was embedded in a large collaborative project to conduct a systematic review on risk factors in the  
128 first 1,000 days of life for the development of cardiometabolic disorders in childhood. The purpose of our  
129 systematic review protocol was to include and evaluate all individual research studies on risk factors and  
130 noninvasive biomarkers in children and adolescents for cardiometabolic disorders during preconception,  
131 pregnancy and infancy. To investigate early childhood risk factors for cardiometabolic outcomes between 2  
132 and 18 years, we aimed to identify case–control, prospective observational, retrospective observational, and  
133 randomized control trials (RCTs) focusing on those risk factors and specific outcomes. Studies that included  
134 diseased populations only, such as mothers with type 1 diabetes, were excluded.

135 Early exposure variables related to sociodemographic factors, lifestyle factors, physical factors, environmental  
136 factors, pregnancy-related factors, and noninvasive biomarkers are referred to as risk factors. Here, risk factors  
137 correspond to exposure variables of interest that are associated with cardiometabolic outcomes such as glucose

138 intolerance, dyslipidemia, hypertension, metabolic syndrome, and T2D. We assessed risk factors in mothers,  
139 fathers, and offspring during preconception, pregnancy, and infancy up to 2 years of age, together covering the  
140 first 1000 days of life. The outcomes of interest in this current review were self-reported, physician- or  
141 researcher-diagnosed; glucose intolerance; dyslipidemia; hypertension; metabolic syndrome; and T2D.

142

### 143 **Data sources, search strategy, and screening criteria**

144 This systematic review protocol was registered to PROSPERO, CRD42022355152. Our search terms for  
145 Medline, EMBASE, WEB OF SCIENCE, SCOPUS, and Cochrane CENTRAL (**Text S1**) relate to eligible  
146 citations published in English before August 17, 2022. We included prospective and retrospective longitudinal  
147 observational studies which identified risk factors associated with offspring outcomes of our interest. A  
148 prospective comparison of treatment allocation effects on outcome was also considered. The exclusion criteria  
149 were: studies with outcomes before 2 years, studies reporting only intermediate phenotypes or continuous  
150 traits, or studies assessing only endpoints other than the cardiometabolic outcomes of interest. Cross-sectional  
151 studies and studies of diseased populations were excluded, except for genetics studies. Two independent  
152 reviewers screened at title and abstract level. For accepted citations, two independent reviewers examined the  
153 entire manuscript. A third reviewer resolved conflicts at all screening levels. The consensus of the full group  
154 was followed on conflicts not resolved by the third reviewer. The covidence online systematic review tracking  
155 platform was used for all screenings.

### 156 **Data extraction and synthesis of results**

157 For eligible manuscripts, we developed and piloted a data extraction template. In addition to manuscript  
158 information, the data-set included details about the study design, demographics of the population, exposure  
159 and outcome assessment, and diagnostic criteria. A total of 8 broad categories of exposures were recorded: (i)  
160 parental lifestyle factors, (ii) parental physical factors, (iii) environmental factors, (iv) pregnancy-related  
161 factors, (v) birth anthropometrics, (vi) feeding patterns, (vii) infant anthropometrics, and (viii) cord blood  
162 biomarkers.

### 163 **Quality assessment (risk of bias) and synthesis**

164 For cohort studies, case–control studies, and randomized clinical trials (RCTs), the Joanna Briggs Institute  
165 (JBI) critical appraisal tool was used to assess the quality of the included studies<sup>20</sup>. For case–control studies,  
166 9 items were used to assess quality, including group’s comparison, assessment of the exposure and outcome,  
167 confounding, exposure period of interest, and statistical methodology. For cohort studies, 11 items were used  
168 to assess quality, including recruitment, assessment of exposure and outcome, confounding, statistical  
169 methodology, and follow-up. In RCTs, 10 items were evaluated according to the JBI criteria, including  
170 selection and allocation, intervention, administration, outcome assessment, follow-up, and statistical analysis.  
171 Using the guidelines, each JBI item was categorized as 'yes', 'no', 'unclear' or 'not applicable'. Any uncertainties  
172 in the assessment were further discussed by the entire research team. Studies with overall scores of 50% or  
173 less on questions answered with ‘Yes’, 50% until 70% questions answered with ‘Yes’, and 70% or more  
174 questions answered with ‘Yes’, were considered low, moderate and high quality, respectively.

## 175 **Quality assessment of risk factors for prediction and prevention**

176 For quality assessment, we selected those risk factors we considered consistently associated with childhood  
177 obesity. Generally, we defined consistently associated risk factors as those for which more than 50% of studies  
178 report an association in the same direction, in at least two studies of moderate or high quality. Based on the  
179 International Life Sciences Institute (ILSI) Europe Marker Validation Initiative, we developed and piloted a  
180 criteria template for quality assessment of risk factors<sup>21</sup> (**Table S1**). Based on methodological aspects, the  
181 study objective, modifiability, predictiveness, and early-life risk factors were evaluated. Two independent  
182 reviewers scored the risk factors at four different levels: proven, strong, moderate, and low. The whole group  
183 discussed conflicts until consensus was reached.

184

## 185 **RESULTS**

### 186 **Characteristics of participants and the screening process**

187 **Figure S1** shows the flow chart for screening all studies (n=35584), of which about one-half were excluded as  
188 duplicates (n=17974). A total of 17610 full-text or abstract articles were screened by two independent  
189 reviewers, and 16059 were scored irrelevant. Full-text screening was conducted on 1551 studies; 302 were

190 extracted, and 112 were analyzed for associations. Ultimately, 68 articles were meeting the inclusion criteria  
191 and were included for the current systematic review.

192 The studies were published between 1991 and 2022 in 31 different countries, with the majority of the data  
193 coming from America, Asia, and Europe. Among the 68 articles included, 59 were observational studies, of  
194 which 38 were prospective and 21 were retrospective studies. Seven were case-control studies, and only 2 were  
195 RCT interventional studies. The sample sizes of the different studies ranged from 50 to 155,411 participants.  
196 **Table 1** shows the characteristics, the main results and the cardiometabolic outcome definitions for each study.

### 197 **Associations of exposures and risk factors for cardiometabolic outcomes in childhood**

198 We reported 229 associations between the main categories of risk factors in the first 1,000 days of life for  
199 cardiometabolic outcomes in childhood, including glucose intolerance, dyslipidemia, hypertension, metabolic  
200 syndrome, and T2D (**Table S2**). These associations were classified as positive, negative, or none. The majority  
201 of associations were positive (n=162) for all cardiometabolic risk factors, with pregnancy and birth categories  
202 exhibiting the greatest associations (**Figure 1**).

203 We found that risk factors including birth anthropometrics, pregnancy complications, cord blood biomarkers,  
204 lifestyle, physical pregnancy, infant anthropometrics, and feeding patterns categories were associated with  
205 glucose intolerance later in childhood. Of 16 evaluated studies, 2 were case-control studies<sup>22,23</sup>, 11 were  
206 prospective studies<sup>24-34</sup>, 1 was a retrospective study<sup>35</sup>, and 2 were RCTs<sup>36,37</sup>. These associations were mainly  
207 studied in pregnancy and birth period, and to a lesser extent in the early infancy period; however, investigation  
208 of the association of exposure and risk factors during preconception and later glucose intolerance was not  
209 reported in any of the reviewed studies. There were 23 associations (82% were positive associations between  
210 risk factors and glucose intolerance in children). Among them, 18 were identified positively associated  
211 pregnancy and at birth period category<sup>22,23,25-28,32-34,37,38</sup> (**Figure 1A**).

212 11 unique studies reported data on dyslipidemia in children, 2 case-control studies<sup>22,39</sup>, 4 prospective  
213 studies<sup>24,28,32,40</sup>, 4 retrospective studies<sup>35,41-43</sup>, and 1 RCT<sup>37</sup>. Within these studies, 22 different risk factors  
214 included in birth anthropometrics, pregnancy complications, lifestyle, sociodemographics, physical pre- and  
215 pregnancy, infant anthropometrics, and feeding patterns categories, were investigated. Pregnancy and birth  
216 factors were the most reported period for associations with dyslipidemia. Indeed, 14 risk factors were  
217 significantly associated with an increased risk for dyslipidemia in childhood<sup>22,28,32,37,39</sup> (**Figure 1B**).



218 We identified 37 studies evaluating risk factors for hypertension in children. The majority were prospective  
219 studies (n=21)<sup>24,28,29,32,40,44-59</sup>, followed by retrospective studies (n=12)<sup>35,41,43,60-68</sup>, case-control studies (n=2)  
220<sup>22,69</sup> and RCTs (n=2)<sup>36,37</sup>. We identified 127 associations between early life factors and childhood hypertension,  
221 of which 66% significantly associated with increased risk for hypertension in childhood<sup>22,28-32,37,43,45-</sup>  
222<sup>50,53,54,56,57,61-68</sup> (**Figure 1C**).

223 We identified 22 studies related to childhood metabolic syndrome, including 4 case-control studies<sup>22,70-72</sup>, 12  
224 prospective studies<sup>31-33,58,73-80</sup>, 5 retrospective studies<sup>66,81-84</sup>, and 1 RCT<sup>37</sup>. **Figure 1D** shows how associations  
225 were distributed during preconception, pregnancy, and infancy. There were 64 different risk factors (including  
226 physical pre- and pregnancy, birth anthropometrics, sociodemographics, pregnancy complications, cord blood  
227 biomarkers, lifestyle, infant anthropometrics, and feeding patterns categories) that associated with metabolic  
228 syndrome as outcome, from which the majority investigated risk factors during pregnancy and birth. A total  
229 of 77% of the associations were positive (49 of 64 total associations), observed in the pregnancy and birth  
230 period (40 positive associations)<sup>22,31-33,37,58,66,70-72,74,76,77,81-83</sup>, as well as the preconception (3 positive  
231 associations)<sup>74,75</sup> and early infancy period (6 positive associations)<sup>33,70,73,78,79</sup> were identified.

232 There were 9 studies that reported associations between risk factors (including physical prepregnancy, birth  
233 anthropometrics, sociodemographics, pregnancy complications, cord blood biomarkers, lifestyle,  
234 environmental, and feeding patterns categories) for developing T2D in children. Of these, 1 was a case-control  
235 study<sup>85</sup>, 4 were prospective studies<sup>27,30,38,86</sup>, and 4 were retrospective studies<sup>42,87-89</sup>. For this outcome, we did  
236 not find RCTs. Thirty-one associations were evaluated. Among them, 23 risk factors were positively associated  
237 with T2D<sup>27,30,38,85-89</sup>, 7 were not associated<sup>42,85,88,89</sup>, and only 1 reported a decreased risk for this outcome<sup>87</sup>.  
238 Most of the associations analyzed were risk factors during pregnancy and birth periods<sup>27,30,42,85,86,88,89</sup>, followed  
239 by early infancy<sup>86-88</sup> and the preconception period<sup>87</sup> (**Figure 1E**).

#### 240 ***Preconception risk factors associated with childhood cardiometabolic outcomes***

241 During the preconception period, 7 studies identified exposures and risk factors to childhood cardiometabolic  
242 outcomes, 6 of which were observational studies, 5 of which were prospective studies<sup>45,46,74,75,80</sup>, 1 of which  
243 was a retrospective study<sup>87</sup>, and 1 of which was a case-control study<sup>39</sup>. No RCTs were reported. We identified  
244 4 risk factors measured during preconception, 3 of which were associated with a higher cardiometabolic risk

245 in children. The prepregnancy maternal BMI and the prepregnancy paternal BMI as exposures were linked  
246 positively to cardiometabolic risk factors<sup>39,45,46,74,75</sup>. Moreover, pregestational diabetes and diabetes were also  
247 positively associated with cardiometabolic risk<sup>87</sup>. Finally, 1 study reported that higher concentrations of plasma  
248 folate, serum vitamin B12 and plasma homocysteine were associated with metabolic syndrome<sup>80</sup> (**Table S2**).  
249 Our current review of the available evidence shows that physical prepregnancy risk factors during the  
250 preconception period, which includes both paternal and maternal exposures, were mostly associated with  
251 metabolic syndrome and hypertension in childhood<sup>45,46,74,75</sup> (**Figure 2A**).

### 252 *Pregnancy and birth risk factors associated with childhood cardiometabolic outcomes*

253 The vast majority of articles included in this study (58 of 68) reported on associations between pregnancy and  
254 birth exposures and cardiometabolic risk factors in childhood. Of those, 48 were observational studies (31  
255 prospective studies<sup>25-34,38,44-58,74,76,77,80,86</sup> and 17 retrospective studies<sup>41,42,60-68,81-83,87-89</sup>), 8 were case-control  
256 studies<sup>22,23,39,69-72,85</sup>, and 2 were RCTs<sup>36,37</sup>. Risk factors identified during pregnancy and birth period were the  
257 most frequently studied, with 197 (86%) associations for all cardiometabolic outcomes. 7 categories of risk  
258 factors were evaluated: birth anthropometrics, sociodemographics, pregnancy complications, lifestyle,  
259 physical, environmental, and cord blood biomarkers (**Figure S2B**). The most frequently assessed  
260 characteristics were birth anthropometrics (n=75), sociodemographic data (n=47), and pregnancy  
261 complications factors (n=34). Concerning the birth anthropometric category, we found that the majority of the  
262 associations were positively associated with cardiometabolic risk, highlighting hypertension, and metabolic  
263 syndrome as the most frequently associated<sup>22,28,34,39,45,46,54,56-58,61,63-66,68,71,82,83,86-89</sup>. However, we reported a high  
264 number of associations that were null<sup>33,41,45,48,65,66,68,69,71,72,85</sup>, most of which were of risk factors with childhood  
265 hypertension, and only 5 were negative associations<sup>44,52,63,64</sup>. Alike the preconception period,  
266 hypertension<sup>22,28,34,45-48,54,56,57,61,63-66,68</sup> and metabolic syndrome<sup>22,28,34,45-48,54,56-58,61,63-66,68,71,72,82,83</sup> were the two  
267 outcomes most frequently associated with birth anthropometrics (**Figure 2B**). We identified 7 birth  
268 anthropometric risk factors correlated with cardiometabolic outcomes. Among them, the birth weight of the  
269 child had the most frequently associated with all of outcomes (n=25)<sup>28,33,39,44,45,48,52,54,58,61,63-66,68,69,71,72,82,83,87</sup>,  
270 13 of which were linked to an increased risk for childhood cardiometabolic issues<sup>28,39,45,48,54,58,61,63,82,83,87</sup>, while  
271 9 had no relationship<sup>33,45,65,66,68,69,71,72</sup>, and 3 had inverse associations<sup>44,52,64</sup> (**Figure S3A**). The most frequent  
272 cardiometabolic outcome associated with birth weight was hypertension. Furthermore, low birth weight or

273 small size for gestational age (LBW/SGA) was identified as a risk factor for glucose intolerance, hypertension,  
274 metabolic syndrome and T2D: 10 positive associations<sup>15,34,54,58,61,64,65,68,86,88,89</sup> and 6 no associations were  
275 observed<sup>45,48,66,72,85</sup> (**Figure S3B**). High birth weight (HBW) or large for gestational age (LGA), was evaluated  
276 by several studies as a potential risk factor for cardiometabolic outcomes. In fact, we identified 15 positive  
277 associations<sup>22,34,58,63,66,72,87,89</sup> for HBW/LGA and cardiometabolic disorder risk and 4 no associations<sup>48,68,69,85</sup>  
278 (**Figure S3C**). As part of the birth anthropometrics group, other exposures were identified, such as gestational  
279 age<sup>39,45,56,58,63,71,82,83</sup>, preterm birth<sup>41,45,47,56,57,71,87</sup>, birth length<sup>44,61,63,82,83</sup>, and mode of delivery (cesarean  
280 delivery)<sup>46,58,87</sup>. Despite the small amount of data, most associations were positive, highlighting both  
281 hypertension and metabolic syndrome as the most adverse cardiometabolic outcomes.

282 Regarding the sociodemographics category, most associations reported a risk of developing all  
283 cardiometabolic outcomes<sup>28,39,45-48,51,53,54,57,58,61,64,77,81,87-89</sup>. **Figure 2C** shows that sociodemographic factors  
284 increased the risk of hypertension<sup>28,45-48,54,57,61,64</sup> and metabolic syndrome<sup>35,58,77</sup> during childhood. The strongest  
285 associations were found between ethnicity<sup>28,45,47,48,51,54,57,58</sup>, maternal education<sup>39,45-47,54,58,61,64,77</sup>, and  
286 income<sup>45,61,64,77,87,88</sup>. Ethnicity was mostly associated with hypertension<sup>28,45,57,58</sup> (**Figure S3D**). Similarly, low  
287 maternal education was positively associated with the risk to develop hypertension, and metabolic syndrome<sup>45-</sup>  
288 <sup>47,54,61,64</sup> (**Figure S3E**). We also reported that low parental income is mostly associated with higher risk to  
289 develop hypertension, metabolic syndrome and T2D<sup>45,61,64</sup> (**Figure S3F**). Cardiometabolic outcomes were also  
290 influenced by other parental factors such as employment<sup>61,64,77</sup>, socioeconomic status<sup>47,77,89</sup>, and marital status<sup>47</sup>.

291 Pregnancy complications were associated with all cardiometabolic outcomes<sup>22,23,25,27,29,30,32,33,39,42,46,47,49,57,62-</sup>  
292 <sup>64,70,81,85-87</sup>, highlighting hypertension<sup>22,29,32,46,47,49,57,62-64</sup> and glucose intolerance<sup>22,23,25,27,29,30,32,33</sup> as the most  
293 reported associations (**Figure 2D**). Among them, we identified gestational diabetes, pregnancy hypertension,  
294 and preeclampsia as the main exposures associated with cardiometabolic outcomes in children. Almost all  
295 associations between these risk factors were positive. All 27 studies on gestational diabetes had a positive  
296 association with all outcomes<sup>22,23,25,27,29,30,32,33,39,47,49,63,70,81,85-87</sup> (**Figure S3G**). Regarding pregnancy-related  
297 hypertension, we found associations for dyslipidemia<sup>39</sup> (1 positive association), hypertension<sup>46,63,64</sup> (3 positive  
298 associations), and metabolic syndrome<sup>81</sup> (1 no association) (**Figure S3H**). We evaluated the associations of  
299 preeclampsia with dyslipidemia<sup>42</sup> (1 for no association), hypertension<sup>42,46,47,57,62,81,87</sup> (4 for positive associations

300 and 1 for no association), metabolic syndrome<sup>81</sup> (1 for no association), and T2D<sup>42,87</sup> (1 for positive association  
301 and 1 for no association) (**Figure S3I**).

302 In addition to the above categories, we also evaluated cord blood biomarkers, lifestyle, physical pregnancy,  
303 and environmental exposures (**Figure 2**). For the cord blood biomarkers, we found 1 study reporting that  
304 telomere length was positively associated with hypertension<sup>48</sup>; plasma folate, serum vitamin B12, and plasma  
305 homocysteine were negatively associated with metabolic syndrome<sup>80</sup>; and umbilical insulin levels were  
306 positively associated with glucose intolerance and T2D<sup>28</sup>. No evidence was found between plasma folate  
307 concentrations and hypertension<sup>51</sup> (**Figure 2E**). The lifestyle category (including exposures such as smoking,  
308 alcohol, drugs, and diet) presented 24 associations with cardiometabolic outcomes<sup>36,37,39,47,51,53,54,58,64,67,77</sup>. The  
309 most frequent associations were related to hypertension during childhood<sup>36,37,47,51,53,54,64,67</sup> (**Figure 2F**).  
310 Concerning physical pregnancy (such as parental anthropometrics, parental BMI, gestational weight gain), we  
311 identified 15 associations<sup>22,39,45,47,53,58,63,64,74,76,81</sup>, 14 of which were related to an increased risk of  
312 cardiometabolic outcomes, especially hypertension<sup>22,45,47,63,64</sup> and metabolic syndrome<sup>22,58,74,76,81</sup> (**Figure 2G**).  
313 The results in the environmental category contrasted, being mostly associated with hypertension. In this  
314 category, there are 7 associations, 3 of which were related to an increased risk of hypertension<sup>61,64,67</sup>, while  
315 the other 2 were not associated with T2D<sup>69,88</sup>. Finally, two negative associations were also found with  
316 hypertension<sup>55,64</sup> (**Figure 2H**).

### 317 *Early infancy-related risk factors associated with childhood cardiometabolic outcomes*

318 We identified 19 studies reporting associations between risk factors in early infancy and adverse  
319 cardiometabolic outcomes in childhood. 2 were case-control studies<sup>58,70</sup>, 7 were retrospective  
320 studies<sup>35,43,61,64,84,87,88</sup>, and 10 were prospective studies<sup>24,40,44,48,53,59,73,78,79,86</sup>. We found 24 associations between  
321 risk factors and cardiometabolic outcomes in children, of which 15 positive associations were  
322 reported<sup>33,40,43,48,53,61,68,70,73,78,79,86-88</sup>, 4 negative associations were observed<sup>44,64,70,87</sup>, and 5 no associations were  
323 found<sup>24,35,51,59,84</sup> (**Figure S2C**). During the period between birth and 2 years of age, feeding patterns and infant  
324 anthropometrics were the main risk factors evaluated. Anthropometrics in infancy were associated with  
325 dyslipidemia<sup>40,43</sup> in 2 out of 3 studies, with hypertension<sup>40,43,48,53,61</sup> in 5 out of 8 studies and with metabolic  
326 syndrome<sup>73,78,79</sup> in 3 out of 3 studies. Only one study investigated anthropometrics and glucose intolerance,

327 and did not report a significant association<sup>24</sup>, for T2D outcomes, no studies were identified. We did not find  
328 any study reporting infant anthropometrics or cardiometabolic outcomes (**Figure 2I**). Feeding patterns, which  
329 means breastfeeding, were the only category correlated mostly with a decreased risk for cardiometabolic  
330 outcomes. Indeed, 16 associations were reported, 8 of which were associated with a lower risk for glucose  
331 intolerance<sup>33,68</sup>, hypertension<sup>68</sup>, metabolic syndrome<sup>33,70,78</sup> and T2D<sup>86-88</sup>. Only one study investigated  
332 breastfeeding and dyslipidemia, but did not report any significant associations<sup>35</sup>, while we found 3 associations  
333 reporting a lower risk for hypertension<sup>64</sup>, metabolic syndrome<sup>70</sup> and T2D<sup>87</sup> (**Figure 2J**).

### 334 **Risk of bias assessment**

335 Case-control studies, observational studies (prospective and retrospective studies), and RCTs were evaluated  
336 for risk of bias. Of the total studies analyzed (n=68), only 15% had low risk of bias. Regarding case-control  
337 studies, we found that 38% of studies showed low bias risk (n=8). For observational studies, the rate was 10%  
338 of low risk of bias (n=58). The percentage of these were distributed between prospective studies, which showed  
339 16% of low bias risk (n=38). However, for retrospective studies, all exhibited at least one item unclear and/or  
340 high risk of bias (n=20). For the randomized control trials, 50% showed low risk of bias (n=2) (**Figure S3-**  
341 **S13**). In case-control studies, we identified that unreliable exposure measurements, and inadequate  
342 confounding strategies were the main conditions associated with high risk of bias (**Figure S14A**). In  
343 observational studies, we identified several conditions associated with high risk of bias, such as loss to follow-  
344 up, unreliable exposure measurements, and inadequate confounding strategies (**Figure S14B**). In the evaluated  
345 RCTs, we did not find high risk of bias for any of the included studies.

### 346 **Assessment of risk factors for prevention and prediction**

347 We evaluated the quality of the assessment of risk factors included in the present systematic review (**Figure**  
348 **3**). Risk factors with high scores on reproducibility, accuracy, standardization, stability, and technical variation  
349 were for the preconception period: maternal prepregnancy weight, in pregnancy and birth: maternal age,  
350 maternal and paternal education, income, parity, anthropometrics, paternal BMI, and gestational weight gain  
351 continuous; and for the early infancy period: breastfeeding, and infant BMI change. Risk factors quality scores  
352 were generally moderate to strong, except for cord blood biomarkers, which were low. A change in the marker  
353 that is linked with a change in the endpoint in one or more target populations was proven for maternal

354 prepregnancy weight, birth weight, LBW/SGA, HBW/LGA, and gestational diabetes. The strongest  
355 theoretically modifiable risk factors on an individual level were diet, and the quality of the majority of risk  
356 factors were scored low based on evidence from the available intervention studies. Finally, for prediction, the  
357 proven risk factors were maternal prepregnancy weight, gestational diabetes, pregnancy hypertension,  
358 maternal education, and parental BMI. Concentrations of plasma homocysteine, parity, and marital status had  
359 the lowest scores (**Figure 3**).

360

361

362

363

364

## 365 **DISCUSSION**

366 In the present systematic review, we examined the associations of early-life exposures during preconception,  
367 pregnancy and birth, and the early infancy period, with adverse cardiometabolic outcomes during childhood  
368 such as glucose intolerance, dyslipidemia, hypertension, metabolic syndrome, and T2D. We identified 59  
369 observational studies (of which 38 prospectives, and 21 retrospectives), 7 case-control and 2 intervention  
370 studies, and we found 228 reported associations between risk factors and all cardiometabolic outcomes, of  
371 which 162 were positive. Exposures during pregnancy and at birth were the most frequently studied in relation  
372 to later life cardiometabolic risk factors. More specifically, high or low birth weight, sociodemographics  
373 factors including education, income and ethnicity, and pregnancy complications (including gestational diabetes  
374 and preeclampsia) were the most frequently reported risk factors associated with cardiometabolic risk.  
375 Additionally, we identified metabolic syndrome and hypertension as the most frequently and positive  
376 associated cardiometabolic outcomes reported.

377 This systematic review offers relevant information on the association between risk factors in the first 1,000  
378 days and childhood cardiometabolic health. It encompasses 3 different timings of exposure: preconception,  
379 pregnancy and birth, and the early life period, as well risk factors such as parental and offspring conditions  
380 that might affect the cardiometabolic profile for up to 18 years. In preconception period, both paternal and  
381 maternal BMI were associated with adverse cardiometabolic health in childhood, including dyslipidemia,  
382 hypertension, metabolic syndrome and T2D. Maternal obesity before pregnancy was associated with impaired  
383 cardiometabolic health. Furthermore, paternal prepregnancy BMI was associated with adverse cardiometabolic  
384 profiles in offspring such as a higher childhood BMI, systolic blood pressure, insulin levels, and lower high-  
385 density lipoprotein cholesterol<sup>75</sup>, although strongest/most profound associations were observed for maternal  
386 prepregnancy BMI. In addition, during the preconception period, we found that pregestational diabetes was  
387 positively associated with T2D in children in one study. Thus, either pregestational or gestational diabetes in  
388 the mother has been associated with childhood-onset T2D<sup>73,87</sup>.

389 Pregnancy and birth were the most frequently studied period to investigate associations of early life  
390 exposures and later in life cardiometabolic outcomes. Our results add support to the developmental origins of  
391 health and disease (DOHaD) hypothesis, which states that adverse intrauterine exposure causes several  
392 metabolic changes during fetal growth, increasing the risk of cardiometabolic disease development<sup>90</sup>. Birth

393 anthropometrics, particularly having a high or low birth weight, showed a consistent positive association with  
394 all cardiometabolic outcomes, being hypertension the most frequently reported. A cross-sectional study  
395 suggests that obesity and hypertension in children and adolescents may be modifiable by birth weight<sup>91</sup>. Using  
396 Mendelian randomization, a study examined whether birth weight could be a risk factor independent of the  
397 intrauterine environment for cardiometabolic outcomes<sup>92</sup>. In the first 1,000 days of life, children born outside  
398 the normal birth weight range tend to regain their genetically determined growth trajectory to compensate for  
399 both restricted and excessive intrauterine growth<sup>93</sup>. In this way, the rapid weight gain in SGA infants increases  
400 the risk of obesity and metabolic diseases such as insulin resistance, impaired glucose tolerance, T2D,  
401 hypertension, and ultimately cardiovascular diseases<sup>94,95</sup>. It has also been demonstrated that birth weight has a  
402 direct impact on plasma triacylglycerols and insulin resistance, whereas obesity has a direct impact on  
403 hypertension, impaired glucose metabolism, and hypertriglyceridemia. Considering that birth weight and  
404 obesity cannot be separated from metabolic syndrome and its components, large prospective studies involving  
405 normal-weight individuals are needed. A recent meta-analysis showed that LBW might increase metabolic  
406 syndrome risk in childhood and adulthood<sup>96</sup>. To assess the potential interaction effects of LBW on metabolic  
407 syndrome, more high-quality studies are needed.

408 At least 30% of women exhibit pregnancy complications, which are among the leading causes of mortality  
409 among pregnant women<sup>97</sup>. These complications can be caused by the natural changes in the mother's body as  
410 a response to her pregnancy, including increased cardiac output, an increased inflammatory response, and  
411 metabolic abnormalities related to insulin resistance<sup>98</sup>. As a consequence, pregnant women are more prone to  
412 develop metabolic disorders such as hypertension and gestational diabetes mellitus<sup>97,99</sup>. Worldwide,  
413 pregnancy-related hypertension is the third leading cause of maternal mortality, affecting between 3% and  
414 10% of pregnancies. A higher incidence of stillbirths and large for gestational-age babies is associated with  
415 gestational diabetes, which affects approximately 7–10% of pregnancies worldwide<sup>100,101</sup>. Both pregnancy  
416 complications are strongly associated with an increased risk of T2D and hypertension. In this systematic  
417 review, we found that gestational diabetes, which is one of the most common current diseases during  
418 pregnancy<sup>102</sup>, is associated with all cardiometabolic outcomes, with glucose intolerance having the greatest  
419 association. Hypertension during pregnancy is associated with dyslipidemia, hypertension and metabolic  
420 syndrome in children. We found associations between preeclampsia and dyslipidemia, hypertension, metabolic



421 syndrome and T2D. Preeclampsia, like pregnancy hypertension, is associated with increased risks for  
422 hypertension, vascular disease, stroke, and venous thromboembolism later in life<sup>103</sup>. Therefore, gestational  
423 diabetes, pregnancy hypertension, and preeclampsia are risk factors for metabolic diseases, and the importance  
424 of pregnancy history to future health should be discussed with all care providers and women.

425 In the current research, we observed that several parental sociodemographic factors have been linked to adverse  
426 cardiometabolic outcomes. Among these factors, several risk factors, such as ethnicity, maternal education,  
427 and income, were associated with hypertension and other cardiometabolic outcomes. We found that ethnicity  
428 is mostly linked to hypertension, metabolic syndrome, dyslipidemia, and glucose intolerance. It is well known  
429 that ethnicity differs in cardiovascular disease prevalence<sup>104</sup>, with minorities having a more adverse  
430 cardiovascular profile than some European countries. Parental prepregnancy factors, pregnancy factors, and  
431 childhood BMI all contribute to these differences. In terms of income, we found a positive association with  
432 hypertension in children. The effect of household income has been analyzed for Black adolescents. This  
433 showed that households with incomes greater than \$75,000 were more likely to have hypertensive-range blood  
434 pressure due to their black race compared to households with incomes less than \$75,000 in United States of  
435 America, however, further research is needed<sup>105</sup>. Both maternal and paternal education were associated with  
436 cardiometabolic outcomes, especially hypertension. In particular, evidence suggests that educational status  
437 might affect the development of adverse cardiometabolic health<sup>106,107</sup>. The majority of the studies show that a  
438 low level of maternal and paternal education is associated with a greater risk of hypertension during  
439 childhood<sup>108,109</sup>. Taken together, these data indicate that parental education level, rather than the individual's  
440 education level, is independently better, showing that infants with low parental education levels are more likely  
441 to develop hypertension<sup>110</sup>.

442 Regarding the early infancy period, we found that breastfeeding is associated with a lower risk of  
443 cardiometabolic outcomes during childhood. Exclusive breastfeeding is highly recommended for infants for at  
444 least the first 6 months of life<sup>111</sup>, and breastfeeding has been shown to reduce the risk of obesity and chronic  
445 noncommunicable diseases, such as T2D<sup>112</sup>. The protein content of infant formulas is traditionally higher than  
446 that of human milk, and all essential amino acids are present in sufficient amounts. While these factors promote  
447 weight gain and growth, they also increase the risk of obesity and metabolic diseases<sup>113</sup>. For a formulation to  
448 be effective, its protein content needs to be as close as possible to that of human milk. Concerning the early

449 infancy period, we also found that infant anthropometrics, especially weight gain and changes in BMI, are  
450 associated with hypertension and metabolic syndrome. These findings are relevant since previous studies have  
451 reported that rapid weight gain during infancy is associated with high blood pressure at 17 years<sup>43</sup>.  
452 Furthermore, rapid weight gain during infancy until 6 months could predict metabolic risk at 17 years<sup>73</sup>;  
453 therefore, maintaining or controlling early infancy weight gain might help to prevent future adult  
454 cardiovascular disease risks.

455 The main strengths of this systematic review has been the extensive search of the literature until 2022 (17610  
456 articles in the first screening), and the implementation of at least two independent reviewers across the phases  
457 of screening and extraction, along with a third independent reviewer to resolve conflicts. The quality of the  
458 manuscript has been performed by evaluating the risk of bias assessment based on JBI guidelines. Using a  
459 standardized procedure, at least two independent reviewers conducted the review. All reviewers discussed to  
460 resolve the conflicts. As part of our attempt to minimize bias in the selection of studies, we adhered to  
461 predefined inclusion and exclusion criteria. By including a large body of evidence, we were able to provide a  
462 comprehensive and robust overview of the available evidence. We only identified 2 RCTs and all the  
463 associations have been based on observational research, either prospective or retrospective studies. Hence,  
464 causality cannot be established between the identified risk factors and cardiometabolic outcomes. However,  
465 there is a huge evidence about the potential risk factor to develop hypertension and metabolic syndrome later  
466 in childhood.

## 467 **Conclusions**

468 We found that parental prepregnancy weight, birth weight, SGA, LGA, pregnancy complications such as  
469 hypertension and gestational diabetes, infant weight gain, and sociodemographics factors such as income,  
470 maternal education level and ethnicity, and not breastfeeding, were associated with cardiometabolic outcomes,  
471 highlighting hypertension and metabolic syndrome in children. These findings provide relevant information  
472 early-life risk prediction and modifying several behavioral patterns from conception to infancy, not only from  
473 mother to father but also from preconception to infancy. Finally, this systematic review provide useful  
474 information that could be applied in clinical practice to prevent or predict the metabolic complications later in

475 childhood. Future studies focused on preconception factors, paternal factors, and sociodemographics are  
476 urgently needed to prevent metabolic disease.

## 477 **Article information**

### 478 **Author contributions**

479 MBH: provided extraction of the data and provided critical intellectual feedback and completed quality  
480 assessment of papers, and drafted the final version of manuscript. FJRO: Drafted the initial version of the  
481 manuscript, completed the review, extraction, and quality assessment of papers, and drafted the final version  
482 of manuscript. SMB: Drafted the initial version of the manuscript, completed the review, extraction, and  
483 quality assessment of papers. ASJK: Drafted the initial version of the manuscript, completed the review,  
484 extraction, and quality assessment of papers. EFV: provided extraction of the data and provided critical  
485 intellectual feedback. MAB: provided extraction of the data and provided critical intellectual feedback. MCC:  
486 provided extraction of the data and provided critical intellectual feedback. JvD: Set up the initial aim of the  
487 study and study protocol, provided extraction of the data and provided critical intellectual feedback. PI:  
488 provided extraction of the data and provided critical intellectual feedback. KK: provided extraction of the data  
489 and provided critical intellectual feedback. CAvLB: provided extraction of the data and provided critical  
490 intellectual feedback. RG: Set up the initial aim of the study and study protocol, completed the review,  
491 extraction, and quality assessment of papers. AG: Set up the initial aim of the study and study protocol,  
492 completed the review, extraction, and quality assessment of papers, and revised the final version of the  
493 manuscript.

494 All authors approved the final version for publication.

### 495 **Conflict of interest disclosures**

496 None reported.

### 497 **Acknowledgements**

498 RG received funding from the Netherlands Organization for Health Research and Development (ZonMW,  
499 grant number 543003109). RG has received funding from the European Union Horizon 2020 research and  
500 innovation program under the ERA-NET Cofund action (No. 727565), European Joint Programming Initiative  
501 A Healthy Diet for a Healthy Life (JPI HDHL), EndObesity, ZonMW Netherlands (No. 529051026). SMB  
502 was supported by the KNAW Ter Meulen Grant/KNAW Medical Science Fund, Royal Netherlands Academy  
503 of Arts & Sciences, and by ILSI Europe. ASJK was supported by ISLI Europe. MCC acknowledges the support  
504 by the Spanish Ministry of Science and Innovation (MCIN) research grant (ref. PID2022-139475OB-I00) and  
505 the award from MCIN/AEI to the Institute of Agrochemistry and Food Technology (IATA-CSIC) as Centre  
506 of Excellence Severo Ochoa (CEX2021-001189-S MCIN/AEI /10.13039/ 501100011033). EFV was  
507 supported by a Predoctoral grant awarded by the Spanish Ministry of Science and Innovation and the European

508 Social Fund Plus (ESF+) for the training of doctors within the framework of the State Plan for Scientific,  
509 Technical and Innovation Research 2021 - 2023. (ref. CEX2021-001189-S-20-1). This paper will be part of  
510 Marco Brandimonte-Hernández's doctorate, which is being completed as part of the "Nutrition and Food  
511 Sciences Program" at the University of Granada, Spain. FJRO was supported by the Spanish Government  
512 (Juan de la Cierva program, Ministry of Science and Innovation). This Project was executed in collaboration  
513 with the Early Nutrition and Long-term Health Task Force of the European Branch of the International Life  
514 Sciences Institute (ILSI Europe). Industry members of this task force are listed on the website [www.ilsieurope.eu](http://www.ilsieurope.eu).  
515 For more information, please contact ILSI Europe by email [info@ilsieurope.be](mailto:info@ilsieurope.be) or call +32 2 771.00.14. The  
516 opinions expressed herein, and the conclusion of the project are those of the authors and do not necessarily  
517 represent the view of ILSI Europe nor those of its member companies.

518

### 519 **Figure legends**

520 **Figure 1.** Positive, negative, and null associations between the main categories of risk factors preconception,  
521 pregnancy and birth, and early infancy and cardiometabolic outcomes: glucose intolerance (A), dyslipidemia  
522 (B), hypertension (C), metabolic syndrome (D), and type 2 diabetes (E).

523 **Figure 2.** Positive, negative, and null associations between risk factors physical prepregnancy (A), birth  
524 anthropometrics (B), pregnancy complications (C), sociodemographic (D), cord blood biomarkers (E),  
525 lifestyle (F), physical pregnancy (G), environmental (H), infant anthropometrics (I), feeding patterns (J) and  
526 cardiometabolic outcomes: glucose intolerance, dyslipidemia, hypertension, metabolic syndrome and type 2  
527 diabetes.

528 **Figure 3.** Quality assessment of identified risk factors based on 'Guideline on quality assessment of risk  
529 factor' from Calder et al. 2017. Four different levels has been represented: proven (hard green), strong (light  
530 green), moderate (yellow), and low (red).

531

532

533 **REFERENCES**

- 534 1. Maximova K, Kuhle S, Davidson Z, Fung C, Veugelers PJ. Cardiovascular risk-factor profiles of normal  
535 and overweight children and adolescents: insights from the Canadian Health Measures Survey.  
536 *Canadian Journal of Cardiology*. 2013;29(8):976-982.
- 537 2. Jebeile H, Kelly AS, O'Malley G, Baur LA. Obesity in children and adolescents: epidemiology, causes,  
538 assessment, and management. *Lancet Diabetes Endocrinol*. 2022;10(5):351-365.
- 539 3. Saeedi P, Petersohn I, Salpea P, et al. Global and regional diabetes prevalence estimates for 2019  
540 and projections for 2030 and 2045: Results from the International Diabetes Federation Diabetes  
541 Atlas. *Diabetes research and clinical practice*. 2019;157:107843.
- 542 4. WHO. *Diabetes Atlas 10th ed World Health Organization, Geneva2021*. 2021.
- 543 5. Maitre L, Julvez J, López-Vicente M, et al. Early-life environmental exposure determinants of child  
544 behavior in Europe: a longitudinal, population-based study. *Environment international*.  
545 2021;153:106523.
- 546 6. Lurbe E, Cifkova R, Cruickshank JK, et al. Management of high blood pressure in children and  
547 adolescents: recommendations of the European Society of Hypertension. *J Hypertens*.  
548 2009;27(9):1719-1742.
- 549 7. Lurbe E, Ingelfinger J. Developmental and Early Life Origins of Cardiometabolic Risk Factors: Novel  
550 Findings and Implications. *Hypertension*. 2021;77(2):308-318.
- 551 8. Finger JD, Busch MA, Du Y, et al. Time Trends in Cardiometabolic Risk Factors in Adults. *Dtsch*  
552 *Arztebl Int*. 2016;113(42):712-719.
- 553 9. Martínez-Jiménez MD, Gómez-García FJ, Gil-Campos M, Pérez-Navero JL. Comorbidities in  
554 childhood associated with extrauterine growth restriction in preterm infants: a scoping review. *Eur*  
555 *J Pediatr*. 2020;179(8):1255-1265.
- 556 10. Ordóñez-Díaz MD, Gil-Campos M, Flores-Rojas K, et al. Impaired Antioxidant Defence Status Is  
557 Associated With Metabolic-Inflammatory Risk Factors in Preterm Children With Extrauterine  
558 Growth Restriction: The BIORICA Cohort Study. *Front Nutr*. 2021;8:793862.
- 559 11. Kankowski L, Ardissino M, McCracken C, et al. The Impact of Maternal Obesity on Offspring  
560 Cardiovascular Health: A Systematic Literature Review. *Front Endocrinol (Lausanne)*.  
561 2022;13:868441.
- 562 12. Brown HL, Smith GN. Pregnancy Complications, Cardiovascular Risk Factors, and Future Heart  
563 Disease. *Obstet Gynecol Clin North Am*. 2020;47(3):487-495.
- 564 13. Pathirana MM, Lassi ZS, Roberts CT, Andraweera PH. Cardiovascular risk factors in offspring  
565 exposed to gestational diabetes mellitus in utero: systematic review and meta-analysis. *J Dev Orig*  
566 *Health Dis*. 2020;11(6):599-616.
- 567 14. Eberle C, Kirchner MF, Herden R, Stichling S. Paternal metabolic and cardiovascular programming of  
568 their offspring: A systematic scoping review. *PLoS One*. 2020;15(12):e0244826.
- 569 15. Santos Ferreira DL, Williams DM, Kangas AJ, et al. Association of pre-pregnancy body mass index  
570 with offspring metabolic profile: Analyses of 3 European prospective birth cohorts. *PLoS medicine*.  
571 2017;14(8):e1002376.
- 572 16. McCarthy K, Ye Y-l, Yuan S, He Q-q. Peer Reviewed: Parental Weight Status and Offspring  
573 Cardiovascular Disease Risks: a Cross-Sectional Study of Chinese Children. *Preventing Chronic*  
574 *Disease*. 2015;12.
- 575 17. Labayen I, Ruiz JR, Ortega FB, et al. Intergenerational cardiovascular disease risk factors involve  
576 both maternal and paternal BMI. *Diabetes care*. 2010;33(4):894-900.
- 577 18. Black RE, Victora CG, Walker SP, et al. Maternal and child undernutrition and overweight in low-  
578 income and middle-income countries. *The lancet*. 2013;382(9890):427-451.
- 579 19. Larqué E, Labayen I, Flodmark C-E, et al. From conception to infancy—early risk factors for  
580 childhood obesity. *Nature Reviews Endocrinology*. 2019;15(8):456-478.
- 581 20. Barker TH, Stone JC, Sears K, et al. Revising the JBI quantitative critical appraisal tools to improve  
582 their applicability: an overview of methods and the development process. *JBI Evidence Synthesis*.  
583 2023;21(3):478-493.

- 584 21. Calder PC, Boobis A, Braun D, et al. Improving selection of markers in nutrition research: evaluation  
585 of the criteria proposed by the ILSI Europe Marker Validation Initiative. *Nutrition Research Reviews*.  
586 2017;30(1):73-81.
- 587 22. Boney CM, Verma A, Tucker R, Vohr BR. Metabolic syndrome in childhood: association with birth  
588 weight, maternal obesity, and gestational diabetes mellitus. *Pediatrics*. 2005;115(3):e290-e296.
- 589 23. Chandler-Laney PC, Bush NC, Granger WM, Rouse DJ, Mancuso MS, Gower BA. Overweight status  
590 and intrauterine exposure to gestational diabetes are associated with children's metabolic health.  
591 *Pediatric obesity*. 2012;7(1):44-52.
- 592 24. Aris IM, Rifas-Shiman SL, Li L-J, et al. Association of weight for length vs body mass index during the  
593 first 2 years of life with cardiometabolic risk in early adolescence. *JAMA network open*.  
594 2018;1(5):e182460-e182460.
- 595 25. Lowe Jr WL, Scholtens DM, Kuang A, et al. Hyperglycemia and adverse pregnancy outcome follow-  
596 up study (HAPO FUS): maternal gestational diabetes mellitus and childhood glucose metabolism.  
597 *Diabetes care*. 2019;42(3):372-380.
- 598 26. Scholtens DM, Kuang A, Lowe LP, et al. Hyperglycemia and Adverse Pregnancy Outcome Follow-up  
599 Study (HAPO FUS): maternal glycemia and childhood glucose metabolism. *Diabetes care*.  
600 2019;42(3):381-392.
- 601 27. Silverman BL, Metzger BE, Cho NH, Loeb CA. Impaired glucose tolerance in adolescent offspring of  
602 diabetic mothers: relationship to fetal hyperinsulinism. *Diabetes care*. 1995;18(5):611-617.
- 603 28. Sun D, Wang T, Heianza Y, et al. Birthweight and cardiometabolic risk patterns in multiracial  
604 children. *International journal of obesity*. 2018;42(1):20-27.
- 605 29. Tam WH, Ma RCW, Ozaki R, et al. In utero exposure to maternal hyperglycemia increases childhood  
606 cardiometabolic risk in offspring. *Diabetes care*. 2017;40(5):679-686.
- 607 30. Tam WH, Ma RCW, Yang X, et al. Glucose intolerance and cardiometabolic risk in children exposed  
608 to maternal gestational diabetes mellitus in utero. *Pediatrics*. 2008;122(6):1229-1234.
- 609 31. Tam WH, Ma RCW, Yang X, et al. Glucose intolerance and cardiometabolic risk in adolescents  
610 exposed to maternal gestational diabetes: a 15-year follow-up study. *Diabetes care*.  
611 2010;33(6):1382-1384.
- 612 32. Väärasmäki M, Pouta A, Elliot P, et al. Adolescent manifestations of metabolic syndrome among  
613 children born to women with gestational diabetes in a general-population birth cohort. *American*  
614 *journal of epidemiology*. 2009;169(10):1209-1215.
- 615 33. Vandyousefi S, Goran MI, Gunderson EP, et al. Association of breastfeeding and gestational  
616 diabetes mellitus with the prevalence of prediabetes and the metabolic syndrome in offspring of  
617 Hispanic mothers. *Pediatric obesity*. 2019;14(7):e12515.
- 618 34. Wu Y, Yu X, Li Y, et al. Adipose tissue mediates associations of birth weight with glucose metabolism  
619 disorders in children. *Obesity*. 2019;27(5):746-755.
- 620 35. Izadi V, Kelishadi R, Qorbani M, et al. Duration of breast-feeding and cardiovascular risk factors  
621 among Iranian children and adolescents: the CASPIAN III study. *Nutrition*. 2013;29(5):744-751.
- 622 36. Mispireta M, Caulfield L, Zavaleta N, et al. Effect of maternal zinc supplementation on the  
623 cardiometabolic profile of Peruvian children: results from a randomized clinical trial. *Journal of*  
624 *developmental origins of health and disease*. 2017;8(1):56-64.
- 625 37. Stewart CP, Christian P, Schulze KJ, LeClerq SC, West Jr KP, Khatry SK. Antenatal micronutrient  
626 supplementation reduces metabolic syndrome in 6-to 8-year-old children in rural Nepal. *The*  
627 *Journal of nutrition*. 2009;139(8):1575-1581.
- 628 38. Pettitt DJ, Bennett PH, Saad MF, Charles MA, Nelson RG, Knowler WC. Abnormal glucose tolerance  
629 during pregnancy in Pima Indian women: long-term effects on offspring. *Diabetes*.  
630 1991;40(Supplement\_2):126-130.
- 631 39. Yang X, Leng J, Liu H, et al. Maternal gestational diabetes and childhood hyperlipidemia. *Diabetic*  
632 *Medicine*. 2021;38(11):e14606.
- 633 40. Berentzen NE, van Rossem L, Gehring U, et al. Overweight patterns throughout childhood and  
634 cardiometabolic markers in early adolescence. *International Journal of Obesity*. 2016;40(1):58-64.

- 635 41. Alves PJS, Araujo Junior E, Henriques ACPT, Carvalho FHC. Preterm at birth is not associated with  
636 greater cardiovascular risk in adolescence. *The Journal of Maternal-Fetal & Neonatal Medicine*.  
637 2016;29(20):3351-3357.
- 638 42. Davidesko S, Nahum Sacks K, Friger M, Haim A, Sheiner E. Prenatal exposure to preeclampsia as a  
639 risk factor for long-term endocrine morbidity of the offspring. *Hypertension in Pregnancy*.  
640 2021;40(1):21-28.
- 641 43. Fujita Y, Kouda K, Nakamura H, Iki M. Association of rapid weight gain during early childhood with  
642 cardiovascular risk factors in Japanese adolescents. *Journal of Epidemiology*. 2013;23(2):103-108.
- 643 44. Adair LS, Cole TJ. Rapid child growth raises blood pressure in adolescent boys who were thin at  
644 birth. *Hypertension*. 2003;41(3):451-456.
- 645 45. Barros FC, Victora CG. Increased blood pressure in adolescents who were small for gestational age  
646 at birth: a cohort study in Brazil. *International Journal of Epidemiology*. 1999;28(4):676-681.
- 647 46. Brunton NM, Dufault B, Dart A, Azad MB, McGavock JM. Maternal body mass index, offspring body  
648 mass index, and blood pressure at 18 years: a causal mediation analysis. *International Journal of*  
649 *Obesity*. 2021;45(12):2532-2538.
- 650 47. Chen Y, Zhao D, Wang B, Zhu J, Zhang J, Zhang Y. Association of intrauterine exposure to aspirin and  
651 blood pressure at 7 years of age: a secondary analysis. *BJOG: An International Journal of Obstetrics*  
652 *& Gynaecology*. 2019;126(5):599-607.
- 653 48. Hemachandra AH, Howards PP, Furth SL, Klebanoff MA. Birth weight, postnatal growth, and risk for  
654 high blood pressure at 7 years of age: results from the Collaborative Perinatal Project. *Pediatrics*.  
655 2007;119(6):e1264-e1270.
- 656 49. Lu J, Zhang S, Li W, et al. Maternal gestational diabetes is associated with offspring's hypertension.  
657 *American journal of hypertension*. 2019;32(4):335-342.
- 658 50. Martens DS, Sleurs H, Dockx Y, Rasking L, Plusquin M, Nawrot TS. Association of newborn telomere  
659 length with blood pressure in childhood. *JAMA Network Open*. 2022;5(8):e2225521-e2225521.
- 660 51. Ni Y, Szpiro A, Loftus C, et al. Associations Between Maternal Nutrition in Pregnancy and Child  
661 Blood Pressure at 4–6 Years: A Prospective Study in a Community-Based Pregnancy Cohort. *The*  
662 *Journal of nutrition*. 2021;151(4):949-961.
- 663 52. Pereira JA, Rondó PH, Lemos JO, de Souza JMP, Dias RSC. The influence of birthweight on arterial  
664 blood pressure of children. *Clinical nutrition*. 2010;29(3):337-340.
- 665 53. Shankaran S, Bann CM, Bauer CR, et al. Prenatal cocaine exposure and BMI and blood pressure at 9  
666 years of age. *Journal of hypertension*. 2010;28(6):1166-1175.
- 667 54. Shankaran S, Das A, Bauer CR, et al. Fetal origin of childhood disease: intrauterine growth  
668 restriction in term infants and risk for hypertension at 6 years of age. *Archives of pediatrics &*  
669 *adolescent medicine*. 2006;160(9):977-981.
- 670 55. Valvi D, Casas M, Romaguera D, et al. Prenatal phthalate exposure and childhood growth and blood  
671 pressure: evidence from the Spanish INMA-Sabadell Birth Cohort Study. *Environmental health*  
672 *perspectives*. 2015;123(10):1022-1029.
- 673 56. Vashishta N, Surapaneni V, Chawla S, Kapur G, Natarajan G. Association among prematurity (< 30  
674 weeks' gestational age), blood pressure, urinary albumin, calcium, and phosphate in early  
675 childhood. *Pediatric Nephrology*. 2017;32:1243-1250.
- 676 57. Vohr BR, Allan W, Katz KH, Schneider KC, Ment LR. Early predictors of hypertension in prematurely  
677 born adolescents. *Acta Paediatrica*. 2010;99(12):1812-1818.
- 678 58. Zhou Y-B, Li H-T, Si K-Y, Zhang Y-L, Wang L-L, Liu J-M. Association of elective cesarean delivery with  
679 metabolic measures in childhood: A prospective cohort study in China. *Nutrition, Metabolism and*  
680 *Cardiovascular Diseases*. 2019;29(8):775-782.
- 681 59. Aris IM, Chen L-W, Tint MT, et al. Body mass index trajectories in the first two years and  
682 subsequent childhood cardio-metabolic outcomes: a prospective multi-ethnic Asian cohort study.  
683 *Scientific reports*. 2017;7(1):8424.
- 684 60. Boerstra BA, Soepnel LM, Nicolaou V, et al. The impact of maternal hyperglycaemia first detected in  
685 pregnancy on offspring blood pressure in Soweto, South Africa. *Journal of Hypertension*.  
686 2022;40(5):969-977.

- 687 61. Bowers K, Liu G, Wang P, et al. Birth weight, postnatal weight change, and risk for high blood  
688 pressure among Chinese children. *Pediatrics*. 2011;127(5):e1272-e1279.
- 689 62. Hoodbhoy Z, Mohammed N, Rozi S, et al. Cardiovascular dysfunction in children exposed to  
690 preeclampsia during fetal life. *Journal of the American Society of Echocardiography*.  
691 2021;34(6):653-661.
- 692 63. Kuciene R, Dulskiene V. Associations of maternal gestational hypertension with high blood pressure  
693 and overweight/obesity in their adolescent offspring: a retrospective cohort study. *Scientific*  
694 *reports*. 2022;12(1):3800.
- 695 64. Liang X, Xiao L, Luo Y, Xu J. Prevalence and risk factors of childhood hypertension from birth  
696 through childhood: a retrospective cohort study. *Journal of human hypertension*. 2020;34(2):151-  
697 164.
- 698 65. Longo-Mbenza B, Ngiyulu R, Bayekula M, et al. Low birth weight and risk of hypertension in African  
699 school children. *European Journal of Cardiovascular Prevention & Rehabilitation*. 1999;6(5):311-  
700 314.
- 701 66. Sousa MACAd, Guimarães ICB, Daltro C, Guimarães AC. Association between birth weight and  
702 cardiovascular risk factors in adolescents. *Arquivos brasileiros de cardiologia*. 2013;101:09-17.
- 703 67. Xu S-L, Liu A-P, Wu Q-Z, et al. Pet ownership in utero and in childhood decreases the effects of  
704 environmental tobacco smoke exposure on hypertension in children: A large population based  
705 cohort study. *Science of the total environment*. 2020;715:136859.
- 706 68. Zarrati M, Shidfar F, Razmpoosh E, et al. Does low birth weight predict hypertension and obesity in  
707 schoolchildren? *Annals of Nutrition and Metabolism*. 2013;63(1-2):69-76.
- 708 69. Dong Y, Zou Z, Yang Z, et al. Association between high birth weight and hypertension in children  
709 and adolescents: a cross-sectional study in China. *Journal of Human Hypertension*. 2017;31(11):737-  
710 743.
- 711 70. Folic N, Folic M, Markovic S, Andjelkovic M, Jankovic S. Risk factors for the development of  
712 metabolic syndrome in obese children and adolescents. 2015.
- 713 71. García H, Loureiro C, Poggi H, et al. Insulin resistance parameters in children born very preterm and  
714 adequate for gestational age. *Endocrinology, Diabetes & Metabolism*. 2022;5(3):e00329.
- 715 72. Hirschler V, Bugna J, Roque M, Gilligan T, Gonzalez C. Does low birth weight predict  
716 obesity/overweight and metabolic syndrome in elementary school children? *Archives of medical*  
717 *research*. 2008;39(8):796-802.
- 718 73. Ekelund U, Ong KK, Linné Y, et al. Association of weight gain in infancy and early childhood with  
719 metabolic risk in young adults. *The Journal of Clinical Endocrinology & Metabolism*. 2007;92(1):98-  
720 103.
- 721 74. Gaillard R, Steegers E, Franco O, Hofman A, Jaddoe V. Maternal weight gain in different periods of  
722 pregnancy and childhood cardio-metabolic outcomes. The Generation R Study. *International*  
723 *journal of obesity*. 2015;39(4):677-685.
- 724 75. Gaillard R, Steegers EA, Duijts L, et al. Childhood cardiometabolic outcomes of maternal obesity  
725 during pregnancy: the Generation R Study. *Hypertension*. 2014;63(4):683-691.
- 726 76. Heikkinen A-L, Pääkkilä F, Hartikainen A-L, Vääräsmäki M, Männistö T, Suvanto E. Maternal thyroid  
727 antibodies associates with cardiometabolic risk factors in children at the age of 16. *The Journal of*  
728 *Clinical Endocrinology & Metabolism*. 2017;102(11):4184-4190.
- 729 77. Iguacel I, Michels N, Ahrens W, et al. Prospective associations between socioeconomically  
730 disadvantaged groups and metabolic syndrome risk in European children. Results from the IDEFICS  
731 study. *International Journal of Cardiology*. 2018;272:333-340.
- 732 78. Khuc K, Blanco E, Burrows R, et al. Adolescent metabolic syndrome risk is increased with higher  
733 infancy weight gain and decreased with longer breast feeding. *International journal of pediatrics*.  
734 2012;2012.
- 735 79. Marinkovic T, Toemen L, Kruihof CJ, et al. Early infant growth velocity patterns and cardiovascular  
736 and metabolic outcomes in childhood. *The Journal of pediatrics*. 2017;186:57-63. e54.
- 737 80. Monasso GS, Santos S, Geurtsen ML, Heil SG, Felix JF, Jaddoe VW. Associations of early pregnancy  
738 and neonatal circulating folate, vitamin B-12, and homocysteine concentrations with



- 739 cardiometabolic risk factors in children at 10 y of age. *The Journal of Nutrition*. 2021;151(6):1628-  
740 1636.
- 741 81. Leybovitz-Haleluya N, Wainstock T, Landau D, Sheiner E. Maternal gestational diabetes mellitus and  
742 the risk of subsequent pediatric cardiovascular diseases of the offspring: a population-based cohort  
743 study with up to 18 years of follow up. *Acta diabetologica*. 2018;55:1037-1042.
- 744 82. Mardones F, Arnaiz P, Pacheco P, et al. Associations of prenatal growth with metabolic syndrome,  
745 insulin resistance, and nutritional status in Chilean children. *BioMed Research International*.  
746 2014;2014.
- 747 83. Mardones F, Villarroel L, Arnaiz P, et al. Prenatal growth and metabolic syndrome components  
748 among Chilean children. *Journal of Developmental Origins of Health and Disease*. 2012;3(4):237-  
749 244.
- 750 84. Yakubov R, Nadir E, Stein R, Klein-Kremer A. The duration of breastfeeding and its association with  
751 metabolic syndrome among obese children. *The Scientific World Journal*. 2015;2015.
- 752 85. Young TK, Martens PJ, Taback SP, et al. Type 2 diabetes mellitus in children: prenatal and early  
753 infancy risk factors among native Canadians. *Archives of pediatrics & adolescent medicine*.  
754 2002;156(7):651-655.
- 755 86. Pettitt DJ, Knowler WC. Long-term effects of the intrauterine environment, birth weight, and  
756 breast-feeding in Pima Indians. *Diabetes care*. 1998;21:B138.
- 757 87. Halipchuk J, Temple B, Dart A, Martin D, Sellers EA. Prenatal, obstetric and perinatal factors  
758 associated with the development of childhood-onset type 2 diabetes. *Canadian journal of diabetes*.  
759 2018;42(1):71-77.
- 760 88. Martens PJ, Shafer LA, Dean HJ, et al. Breastfeeding initiation associated with reduced incidence of  
761 diabetes in mothers and offspring. *Obstetrics & Gynecology*. 2016;128(5):1095-1104.
- 762 89. Wei J-N, Sung F-C, Li C-Y, et al. Low birth weight and high birth weight infants are both at an  
763 increased risk to have type 2 diabetes among schoolchildren in Taiwan. *Diabetes care*.  
764 2003;26(2):343-348.
- 765 90. Barker DJ. The fetal and infant origins of adult disease. *BMJ: British Medical Journal*.  
766 1990;301(6761):1111.
- 767 91. Nugent JT, Lu Y, Deng Y, Sharifi M, Greenberg JH. Effect measure modification by birth weight on  
768 the association between overweight or obesity and hypertension in children and adolescents.  
769 *JAMA pediatrics*. 2023;177(7):735-737.
- 770 92. Warrington NM, Beaumont RN, Horikoshi M, et al. Maternal and fetal genetic effects on birth  
771 weight and their relevance to cardio-metabolic risk factors. *Nature genetics*. 2019;51(5):804-814.
- 772 93. Ong KK, Ahmed ML, Emmett PM, Preece MA, Dunger DB. Association between postnatal catch-up  
773 growth and obesity in childhood: prospective cohort study. *Bmj*. 2000;320(7240):967-971.
- 774 94. Bizerea-Moga TO, Pitulice L, Pantea CL, Olah O, Marginean O, Moga TV. Extreme birth weight and  
775 metabolic syndrome in children. *Nutrients*. 2022;14(1):204.
- 776 95. Chiavaroli V, Derraik JG, Hofman PL, Cutfield WS. Born large for gestational age: bigger is not always  
777 better. *The Journal of pediatrics*. 2016;170:307-311.
- 778 96. Liao L, Deng Y, Zhao D. Association of low birth weight and premature birth with the risk of  
779 metabolic syndrome: a meta-analysis. *Frontiers in Pediatrics*. 2020;8:405.
- 780 97. Fraser A, Nelson SM, Macdonald-Wallis C, et al. Associations of pregnancy complications with  
781 calculated cardiovascular disease risk and cardiovascular risk factors in middle age: the Avon  
782 Longitudinal Study of Parents and Children. *Circulation*. 2012;125(11):1367-1380.
- 783 98. Seely EW, Solomon CG. Insulin resistance and its potential role in pregnancy-induced hypertension.  
784 *The journal of clinical endocrinology & metabolism*. 2003;88(6):2393-2398.
- 785 99. Umesawa M, Kobashi G. Epidemiology of hypertensive disorders in pregnancy: prevalence, risk  
786 factors, predictors and prognosis. *Hypertension Research*. 2017;40(3):213-220.
- 787 100. Behboudi-Gandevani S, Amiri M, Bidhendi Yarandi R, Ramezani Tehrani F. The impact of diagnostic  
788 criteria for gestational diabetes on its prevalence: a systematic review and meta-analysis.  
789 *Diabetology & metabolic syndrome*. 2019;11:1-18.

- 790 101. Wambua S, Singh M, Okoth K, et al. Association between pregnancy-related complications and  
791 development of type 2 diabetes and hypertension in women: an umbrella review. *BMC medicine*.  
792 2024;22(1):66.
- 793 102. Saravanan P, Magee LA, Banerjee A, et al. Gestational diabetes: opportunities for improving  
794 maternal and child health. *The Lancet Diabetes & Endocrinology*. 2020;8(9):793-800.
- 795 103. Leslie MS, Briggs LA. Preeclampsia and the Risk of Future Vascular Disease and Mortality: A Review.  
796 *Journal of Midwifery & Women's Health*. 2016;61(3):315-324.
- 797 104. Bhopal RS, Humphry RW, Fischbacher CM. Changes in cardiovascular risk factors in relation to  
798 increasing ethnic inequalities in cardiovascular mortality: comparison of cross-sectional data in the  
799 Health Surveys for England 1999 and 2004. *BMJ open*. 2013;3(9):e003485.
- 800 105. Nagata JM, Shim JE, Balasubramanian P, et al. Sociodemographic Associations With Blood Pressure  
801 in 10–14-Year-Old Adolescents. *Journal of Adolescent Health*. 2024.
- 802 106. Cundiff JM, Lin SS-H, Faulk RD, McDonough IM. Educational quality may be a closer correlate of  
803 cardiometabolic health than educational attainment. *Scientific Reports*. 2022;12(1):18105.
- 804 107. Yu S, Sun Y. Low educational status correlates with a high incidence of mortality among  
805 hypertensive subjects from Northeast Rural China. *Frontiers in Public Health*. 2022;10:951930.
- 806 108. Suh SH, Song SH, Choi HS, et al. Parental educational status independently predicts the risk of  
807 prevalent hypertension in young adults. *Scientific Reports*. 2021;11(1):3698.
- 808 109. Amiri P, Rezaei M, Jalali-Farahani S, et al. Risk of hypertension in school-aged children with  
809 different parental risk: a longitudinal study from childhood to young adulthood. *BMC pediatrics*.  
810 2021;21:1-11.
- 811 110. Kwok MK, Schooling CM, Subramanian SV, Leung GM, Kawachi I. Pathways from parental  
812 educational attainment to adolescent blood pressure. *Journal of hypertension*. 2016;34(9):1787-  
813 1795.
- 814 111. Butte NF, Lopez-Alarcon MG, Garza C. *Nutrient adequacy of exclusive breastfeeding for the term  
815 infant during the first six months of life*. World Health Organization; 2002.
- 816 112. Kelishadi R, Farajian S. The protective effects of breastfeeding on chronic non-communicable  
817 diseases in adulthood: A review of evidence. *Advanced biomedical research*. 2014;3(1):3.
- 818 113. Koletzko B, Bergmann K, Brenna JT, et al. Should formula for infants provide arachidonic acid along  
819 with DHA? A position paper of the European Academy of Paediatrics and the Child Health  
820 Foundation. *The American journal of clinical nutrition*. 2020;111(1):10-16.

821  
822

823

824

825

826

827

828

829

830

831

832

833

834

835

**Table 1.** Characteristics of studies included in the systematic review.

| Author              | Year | Country          | Study type  | Study name or site (Year of birth)                                                 | Exposure (main)                               | Exposure (time period)                     | Exposure (sub)                                                                                 | Exposure ascertainme nt        | Outcome (main)                            | Definition of cardiovascular hard endpoints                                                                                                                                   | Sample Size* |
|---------------------|------|------------------|-------------|------------------------------------------------------------------------------------|-----------------------------------------------|--------------------------------------------|------------------------------------------------------------------------------------------------|--------------------------------|-------------------------------------------|-------------------------------------------------------------------------------------------------------------------------------------------------------------------------------|--------------|
| Adair <sup>44</sup> | 2003 | The Philip pines | Pros. Obs.  | Cebu Longitudinal Health and Nutrition Survey                                      | Birth anthropometrics; Infant anthropometrics | Pregnancy and birth; Early infancy (<2 yr) | Birthweight; Birth length Weight change;                                                       | Self-reported; Medical reports | Hypertension (mmHg)                       | Systolic and diastolic blood pressure > 90th percentile for sex                                                                                                               | 2026         |
| Alves <sup>41</sup> | 2016 | Brazil           | Retro. Obs. | Preterm at birth is not associated with greater cardiovascular risk in adolescence | Birth anthropometrics                         | Pregnancy and birth                        | Adverse birth outcomes (preterm birth, small-/large-for-gestational age, low/high birthweight) | Medical reports                | Hypertension (mmHg); Dyslipidemia (mg/dL) | Systolic and diastolic blood pressure > 90th percentile<br><br>Dyslipidemia: The references of the I guideline for prevention of atherosclerosis in childhood and adolescence | 134          |
| Aris <sup>59</sup>  | 2017 | Singap ore       | Pros. Obs.  | Growing Up in Singapore Towards healthy Outcomes study                             | Infant anthropometrics                        | Early infancy (<2 yr)                      | BMI change                                                                                     | Medical reports                | Hypertension (mmHg)                       | Systolic or diastolic > 90th percentile for the children for age, height and sex                                                                                              | 1170         |
| Aris <sup>24</sup>  | 2018 | USA, Belaru s    | Pros. Obs.  | (Project Viva) and Belarus (Promotion of Breastfeeding Intervention Trial, PROBIT  | Infant anthropometrics                        | Early infancy (<2 yr)                      | Weight change; BMI change                                                                      | Medical reports                | Hypertension (mmHg); Glucose intolerance; | Hypertension: Systolic blood pressure z scores                                                                                                                                | 13666        |

|                         |      |             |            |                                             |                                                   |                                    |                                                                                                                                                                                                                        |                                |                                                         |                                                                                                                                                 |      |
|-------------------------|------|-------------|------------|---------------------------------------------|---------------------------------------------------|------------------------------------|------------------------------------------------------------------------------------------------------------------------------------------------------------------------------------------------------------------------|--------------------------------|---------------------------------------------------------|-------------------------------------------------------------------------------------------------------------------------------------------------|------|
|                         |      |             |            |                                             |                                                   |                                    |                                                                                                                                                                                                                        |                                | Dyslipidemia (mg/dL)                                    | Glucose intolerance: HOMA-IR                                                                                                                    |      |
|                         |      |             |            |                                             |                                                   |                                    |                                                                                                                                                                                                                        |                                |                                                         | Dyslipidemia: HDL-C, triglyceride levels, apolipoprotein A                                                                                      |      |
| Barros <sup>45</sup>    | 1999 | Brazil      | Pros. Obs. | Pelotas birth cohort study                  | Sociodemographic; Physical; Birth anthropometrics | Preconception; Pregnancy and birth | Pre-pregnancy BMI; Education; Income; Ethnicity; Anthropometrics (Maternal BMI); Birthweight; Gestational age at birth; Adverse birth outcomes (preterm birth, small-/large-for-gestational age, low/high birthweight) | Medical reports                | Hypertension (mmHg)                                     | Systolic and diastolic blood pressure > 95th percentile                                                                                         | 1076 |
| Berentzen <sup>40</sup> | 2016 | Netherlands | Pros. Obs. | Prevention and Incidence of Asthma and Mite | Infant anthropometrics                            | Early Infancy (<2 yr)              | BMI change                                                                                                                                                                                                             | Self-reported; Medical reports | Hypertension (mmHg); Dyslipidemia (mmol <sup>-1</sup> ) | Hypertension: Systolic blood pressure > 127 mmHg and Diastolic blood pressure > 75 mmHg<br><br>Dyslipidemia: TC > 4.9 mmol <sup>-1</sup> ; HDLC | 1500 |

|                        |      |              |                       |                                                                                                                       |                                                          |                     |                                                                                                                                                          |                                    |                                                                             |                                                                                                                                                                                                                                                                                                                |     |
|------------------------|------|--------------|-----------------------|-----------------------------------------------------------------------------------------------------------------------|----------------------------------------------------------|---------------------|----------------------------------------------------------------------------------------------------------------------------------------------------------|------------------------------------|-----------------------------------------------------------------------------|----------------------------------------------------------------------------------------------------------------------------------------------------------------------------------------------------------------------------------------------------------------------------------------------------------------|-----|
| Boerstra <sup>60</sup> | 2022 | South Africa | Retro. Obs.           | The impact of maternal hyperglycaemia first detected in pregnancy on offspring blood pressure in Soweto, South Africa | Pregnancy complications                                  | Pregnancy and birth | Other: Hyperglycemia                                                                                                                                     | Medical reports; Biochemical tests | Hypertension (mmHg)                                                         | < 1.0 mmol <sup>-1</sup> ; TC/HDL ratio > 44.2<br>Systolic and diastolic blood pressure > 90th percentile for age, height and sex                                                                                                                                                                              | 189 |
| Boney <sup>22</sup>    | 2005 | USA          | Cross-sectional study | Metabolic syndrome in childhood: Association with birth weight, maternal obesity, and gestational diabetes mellitus   | Physical; Pregnancy complications; Birth anthropometrics | Pregnancy and birth | Anthropometrics (Maternal obesity); Gestational diabetes; Adverse birth outcomes (preterm birth, small-/large-for-gestational age, low/high birthweight) | Medical reports; Biochemical tests | Glucose intolerance (mg/dL); Hypertension; Dyslipidemia; Metabolic syndrome | Glucose intolerance: 2-hour postprandial glucose level > 140 mg/dL or fasting glucose level > 110 mg/dL<br>Hypertension: Systolic and diastolic blood pressure > 95th percentile for age<br>Dyslipidemia: HDL concentration < 5th percentile for age, and triglyceride concentration > 95th percentile for age | 175 |

|                              |      |       |             |                                                                                                |                                                                                       |                                            |                                                                                                                                                                                            |                                |                             |                                                                                  |       |
|------------------------------|------|-------|-------------|------------------------------------------------------------------------------------------------|---------------------------------------------------------------------------------------|--------------------------------------------|--------------------------------------------------------------------------------------------------------------------------------------------------------------------------------------------|--------------------------------|-----------------------------|----------------------------------------------------------------------------------|-------|
|                              |      |       |             |                                                                                                |                                                                                       |                                            |                                                                                                                                                                                            |                                |                             | Metabolic syndrome: defined by the National Cholesterol Education Program (NCEP) |       |
| Bowers <sup>61</sup>         | 2011 | China | Retro. Obs. | Birth weight, postnatal weight change, and risk for high blood pressure among Chinese children | Sociodemographic; Environmental: Birth anthropometrics; Infant anthropometrics        | Pregnancy and birth; Early infancy (<2 yr) | Education; Employment; Income; Other: rural area; Birthweight; Birth length; Adverse birth outcomes (preterm birth, small-/large-for-gestational age, low/high birthweight); Weight change | Self-reported; Medical reports | Hypertension (mmHg)         | Systolic and diastolic pressure > 90th percentile for age and sex                | 15600 |
| Brunton <sup>46</sup>        | 2021 | UK    | Pros. Obs.  | Avon Longitudinal Study of Parents and Children                                                | Physical; Sociodemographic; Lifestyle; Pregnancy complications; Birth anthropometrics | Preconception; Pregnancy and birth         | Pre-pregnancy BMI; Education; Pre-eclampsia; Pregnancy hypertension; Mode of delivery                                                                                                      | Self-reported                  | Hypertension (mmHg)         | Systolic blood pressure > 120 mmHg or diastolic blood pressure > 80 mmHg         | 3217  |
| Chandler-Laney <sup>23</sup> | 2012 | USA   | Retro. Obs. | Overweight status and intrauterine exposure to gestational                                     | Pregnancy complications                                                               | Pregnancy and birth                        | Gestational diabetes                                                                                                                                                                       | Self-reported; Medical reports | Glucose intolerance (mg/dL) | Fasting glucose ≥100 mg/dL                                                       | 51    |

diabetes are associated with children's metabolic health

|                       |      |        |             |                                                                                                       |                                                                                       |                     |                                                                                                                                                                                                                                                                        |                 |                               |                                                                                                                   |        |
|-----------------------|------|--------|-------------|-------------------------------------------------------------------------------------------------------|---------------------------------------------------------------------------------------|---------------------|------------------------------------------------------------------------------------------------------------------------------------------------------------------------------------------------------------------------------------------------------------------------|-----------------|-------------------------------|-------------------------------------------------------------------------------------------------------------------|--------|
| Chen <sup>47</sup>    | 2019 | USA    | Pros. Obs.  | Collaborative Perinatal Project                                                                       | Sociodemographic; Physical; Lifestyle; Pregnancy complications; Birth anthropometrics | Pregnancy and birth | Maternal age; Ethnicity; Education; Marital status; Socioeconomic status; Anthropometrics (Overweight/Obesity) Other: Aspirin use; Pre-eclampsia; Gestational diabetes; Adverse birth outcomes (preterm birth, small-/large-for-gestational age, low/high birthweight) | Self-reported   | Hypertension (mmHg)           | Systolic and diastolic pressure $\geq$ 90th percentile within the CPP population BP distributions by sex and race | 35885  |
| Davidek <sup>42</sup> | 2021 | Israel | Retro. Obs. | Prenatal exposure to preeclampsia as a risk factor for long-term endocrine morbidity of the offspring | Pregnancy complications                                                               | Pregnancy and birth | Pre-eclampsia                                                                                                                                                                                                                                                          | Medical reports | Type 2 Diabetes; Dyslipidemia | Type 2 Diabetes: Predefined by a set of ICD-9 codes<br><br>Dyslipidemia: Predefined by a set of ICD-9 codes       | 253808 |

|                          |      |        |                       |                                                                                                                      |                                      |                           |                                                                                                                                      |                                    |                                         |                                                                                                                                                                                                                                                                                  |      |
|--------------------------|------|--------|-----------------------|----------------------------------------------------------------------------------------------------------------------|--------------------------------------|---------------------------|--------------------------------------------------------------------------------------------------------------------------------------|------------------------------------|-----------------------------------------|----------------------------------------------------------------------------------------------------------------------------------------------------------------------------------------------------------------------------------------------------------------------------------|------|
| de Sousa <sup>66</sup>   | 2013 | Brazil | Retro. Obs.           | Association between Birth Weight and Cardiovascular Risk Factors in Adolescents                                      | Birth anthropometrics                | Pregnancy and birth       | Birthweight; Adverse birth outcomes (preterm birth, small-/large-for-gestational age, low/high birthweight)                          | Self-reported; Medical reports     | Hypertension (mmHg); Metabolic syndrome | Hypertension: $\geq$ 95th percentile for age, gender and height.<br><br>Metabolic syndrome: the diagnosis required meeting at least 3 of 5 criteria: TG $\geq$ 100 mg/dL; HDL-C $<$ 50 mg/dL; fasting glycemia $\geq$ 100 mg/dL; WC $>$ 75th percentile; SBP $>$ 90th percentile | 250  |
| Dong <sup>69</sup>       | 2017 | China  | Cross-sectional study | Association between high birth weight and hypertension in children and adolescents: A cross-sectional study in China | Environmental; Birth anthropometrics | Pregnancy and birth       | Other: urban/rural area; Birthweight; Adverse birth outcomes (preterm birth, small-/large-for-gestational age, low/high birthweight) | Self-reported                      | Hypertension (mmHg)                     | Systolic and diastolic pressure $>$ 95th percentile for age, height and sex                                                                                                                                                                                                      | 9962 |
| Ekelund <sup>70,73</sup> | 2007 | Sweden | Pros. Obs.            | The Stockholm Weight Development Study                                                                               | Infant anthropometrics               | Early infancy ( $<$ 2 yr) | Weight change;                                                                                                                       | Medical reports; Biochemical tests | Metabolic Syndrome                      | Metabolic syndrome risk as a continuous standardized combined score broadly based on the World Health Organization-                                                                                                                                                              | 128  |



|                        |      |             |                       |                                                                                                                  |                                           |                                            |                                         |                 |                                            | defined outcome variables                                                                                                                                                                                                                               |      |
|------------------------|------|-------------|-----------------------|------------------------------------------------------------------------------------------------------------------|-------------------------------------------|--------------------------------------------|-----------------------------------------|-----------------|--------------------------------------------|---------------------------------------------------------------------------------------------------------------------------------------------------------------------------------------------------------------------------------------------------------|------|
| Folić <sup>70</sup>    | 2015 | Serbia      | Cross-sectional study | Risk factors for the development of metabolic syndrome in obese children and adolescents                         | Pregnancy complications; Feeding patterns | Pregnancy and birth; Early infancy (<2 yr) | Gestational diabetes; Breastfeeding     | Self-reported   | Metabolic Syndrome                         | MetS according to the IDF criteria                                                                                                                                                                                                                      | 84   |
| Fujita <sup>43</sup>   | 2013 | Japan       | Retro. Obs.           | Association of rapid weight gain during early childhood with cardiovascular risk factors in Japanese adolescents | Infant anthropometrics                    | Early infancy (<2 yr)                      | Weight change; BMI change               | Medical reports | Hypertension (mmHg); Dyslipidemia (mmol/L) | Hypertension: Systolic and diastolic pressure $\geq$ 90th percentile for age and sex<br><br>Dyslipidemia: LDL-C $\geq$ 90th percentile or an HDL-C $\leq$ 10th percentile                                                                               | 1624 |
| Gaillard <sup>75</sup> | 2014 | Netherlands | Pros. Obs.            | Generation R Study                                                                                               | Physical                                  | Preconception                              | Pre-pregnancy maternal and paternal BMI | Medical reports | Metabolic Syndrome                         | 3 or more of the following components: android fat mass % $\geq$ 75th percentile; systolic or diastolic blood pressure $\geq$ 75th percentile; high-density lipoprotein cholesterol $\leq$ 25th percentile or triglycerides $\geq$ 75th percentile; and | 4871 |

|                        |      |             |                       |                                                                                              |                                                |                                    |                                                                                                                                        |                 |                    |                                                                                                                                                                                                                                                                                                             |      |
|------------------------|------|-------------|-----------------------|----------------------------------------------------------------------------------------------|------------------------------------------------|------------------------------------|----------------------------------------------------------------------------------------------------------------------------------------|-----------------|--------------------|-------------------------------------------------------------------------------------------------------------------------------------------------------------------------------------------------------------------------------------------------------------------------------------------------------------|------|
| Gaillard <sup>74</sup> | 2015 | Netherlands | Pros. Obs.            | Generation R Study                                                                           | Physical                                       | Preconception; Pregnancy and birth | Pre-pregnancy maternal BMI; Gestational weight gain                                                                                    | Medical reports | Metabolic Syndrome | insulin level $\geq$ 75th percentile.<br>3 or more of the following components:<br>android fat mass % $>$ 75th percentile;<br>systolic or diastolic blood pressure $>$ 75th percentile;<br>HDL-cholesterol $<$ 25th percentile or triglycerides $>$ 75th percentile; and insulin level $>$ 75th percentile. | 5908 |
| García <sup>71</sup>   | 2022 | Chile       | Cross-sectional study | Insulin resistance parameters in children born very preterm and adequate for gestational age | Pregnancy complications; Birth anthropometrics | Pregnancy and birth                | Birth weight; Gestational age at birth; Adverse birth outcomes (preterm birth, small-/large-for-gestational age, low/high birthweight) | Medical reports | Metabolic Syndrome | 3 or more of the following components:<br>abdominal circumference $\geq$ 90th percentile, BP $\geq$ 90th percentile, fasting glycaemia $\geq$ 100 mg/dl, HDL cholesterol $\leq$ 40 mg/dL and triglycerides $\geq$ 110 mg/dL                                                                                 | 120  |

|                         |      |         |             |                                            |                                                                                              |                                                           |                                                                                                                                                                                                                     |                                    |                    |                                                                                                                                                                                                                                                                         |      |
|-------------------------|------|---------|-------------|--------------------------------------------|----------------------------------------------------------------------------------------------|-----------------------------------------------------------|---------------------------------------------------------------------------------------------------------------------------------------------------------------------------------------------------------------------|------------------------------------|--------------------|-------------------------------------------------------------------------------------------------------------------------------------------------------------------------------------------------------------------------------------------------------------------------|------|
| Halipchuk <sup>87</sup> | 2018 | Canada  | Retro. Obs. | Population Health Research Data Repository | Sociodemographic; Physical; Pregnancy complications; Birth anthropometrics; Feeding patterns | Preconception; Pregnancy and birth; Early infancy (<2 yr) | Pre-gestational diabetes; Income; Gestational diabetes; Pre-eclampsia; Mode of delivery; Birthweight; Adverse birth outcomes (preterm birth, small-/large-for-gestational age, low/high birthweight); Breastfeeding | Medical reports; Biochemical tests | Type 2 Diabetes    | Gestational diabetes was defined as a diagnosis of diabetes at > 21 weeks' gestation or any first-time diagnosis of diabetes at or after 21 weeks' gestation                                                                                                            | 1611 |
| Heikkinen <sup>76</sup> | 2017 | Finland | Pros. Obs.  | Northern Finland Birth Cohort 1986         | Physical                                                                                     | Pregnancy and birth                                       | Other: Thyroid Antibodies (TSH, fT4, TPO-Abs, and thyroglobulin antibodies)                                                                                                                                         | Biochemical tests                  | Metabolic Syndrome | Abdominal obesity (Girls: > 80 cm; boys: > 87.5 cm) and two or more of the following clinical features: elevated triglycerides (> 1.7mmol/L), low HDL-cholesterol (> 5mmol/L), high blood pressure (Systolic > 130 mm Hg or diastolic > 85 mm Hg), and increased plasma | 4176 |

glucose (> 5.6 mmol/L).

|                           |      |           |                       |                                                                                                        |                                                                                |                                            |                                                                                                                                       |                                |                     |                                                                                                                                                                                                                                                      |       |
|---------------------------|------|-----------|-----------------------|--------------------------------------------------------------------------------------------------------|--------------------------------------------------------------------------------|--------------------------------------------|---------------------------------------------------------------------------------------------------------------------------------------|--------------------------------|---------------------|------------------------------------------------------------------------------------------------------------------------------------------------------------------------------------------------------------------------------------------------------|-------|
| Hemachandra <sup>48</sup> | 2007 | USA       | Pros. Obs.            | The US Collaborative Perinatal Project                                                                 | Sociodemographic; complications; Birth anthropometrics; Infant anthropometrics | Pregnancy and birth; Early infancy (<2 yr) | Ethnicity; Birthweight; Adverse birth outcomes (preterm birth, small-/large-for-gestational age, low/high birthweight); Weight change | Self-reported; Medical reports | Hypertension (mmHg) | Systolic blood pressure or diastolic blood pressure > 90th percentile                                                                                                                                                                                | 29710 |
| Hirschleir <sup>72</sup>  | 2008 | Argentina | Cross-sectional study | Does Low Birth Weight Predict Obesity/Overweight and Metabolic Syndrome in Elementary School Children? | Birth anthropometrics                                                          | Pregnancy and birth                        | Birthweight; Adverse birth outcomes (preterm birth, small-/large-for-gestational age, low/high birthweight)                           | Self-reported; Medical reports | Metabolic Syndrome  | 3 of the following 5 conditions: abdominal obesity (WC > 90th percentile); fasting triglycerides > 110 mg/dL; HDL-C < 40 mg/dL; blood pressure > 90th percentile for age, height and sex; fasting glucose > 100 mg/dL or use of diabetes medications | 1027  |
| Hoodbhoy <sup>62</sup>    | 2021 | Pakistan  | Retro. Obs.           | Cardiovascular Dysfunction in Children Exposed to Preeclampsia                                         | Pregnancy complications                                                        | Pregnancy and birth                        | Pre-eclampsia                                                                                                                         | Medical reports                | Hypertension (mmHg) | Systolic blood pressure ≥ 140 mmHg and diastolic blood                                                                                                                                                                                               | 160   |

|                      |      |                                                                     |             |                                                                                                                                         |                             |                       |                                                                                                                |               |                                                                        |                                                                                                                                                                                                                                                    |      |
|----------------------|------|---------------------------------------------------------------------|-------------|-----------------------------------------------------------------------------------------------------------------------------------------|-----------------------------|-----------------------|----------------------------------------------------------------------------------------------------------------|---------------|------------------------------------------------------------------------|----------------------------------------------------------------------------------------------------------------------------------------------------------------------------------------------------------------------------------------------------|------|
| Iguacel <sup>7</sup> | 2018 | Belgium, Cyprus, Estonia, Germany, Hungary, Italy, Spain and Sweden | Pros. Obs.  | During Fetal Life<br>" Identification and Prevention of Dietary-and Lifestyle-induced Health Effects in Children and Infants (IDEFICS)" | Sociodemographic; Lifestyle | Pregnancy and birth   | Education; Income; Employment; Other: Social network parents, non- Traditional family; Diet; Physical activity | Self-reported | Metabolic Syndrome                                                     | pressure $\geq$ 90 mmHg<br>Sum of sex and age specific z-scores of WC, HOMA-IR index, mean of z-scores of diastolic and systolic blood pressure (SBP, DBP) and mean of z-score of HDL cholesterol multiplied by $-1$ and z-score of triglycerides. | 2401 |
| Izadi <sup>35</sup>  | 2013 | Iran                                                                | Retro. Obs. | Childhood and Adolescence Surveillance and Prevention of Adult Non-communicable disease Study                                           | Feeding patterns            | Early infancy (<2 yr) | Breastfeeding                                                                                                  | Self-reported | Glucose intolerance (mg/dL); Hypertension (mmHg); Dyslipidemia (mg/dL) | Glucose intolerance: elevated FBS > 100 mg/dL<br>Hypertension: high BP: > 95th adjusted by age, sex, height<br>Dyslipidemia: high LDL: > 110 mg/dL; high TG: > 100 mg/dL; high TC: > 200 mg/dL                                                     | 5528 |

|                            |      |         |               |                                          |                            |                        |                         |                      |                                                                                                                      |                                                                                                                                                                                                                                                                                                                                                                                                                                                                                                                                                                                                                                                                                                                            |      |
|----------------------------|------|---------|---------------|------------------------------------------|----------------------------|------------------------|-------------------------|----------------------|----------------------------------------------------------------------------------------------------------------------|----------------------------------------------------------------------------------------------------------------------------------------------------------------------------------------------------------------------------------------------------------------------------------------------------------------------------------------------------------------------------------------------------------------------------------------------------------------------------------------------------------------------------------------------------------------------------------------------------------------------------------------------------------------------------------------------------------------------------|------|
| Järvelin <sup>3</sup><br>2 | 2009 | Finland | Pros.<br>Obs. | Northern<br>Finland 1986<br>Birth Cohort | Pregnancy<br>complications | Pregnancy and<br>birth | Gestational<br>diabetes | Biochemical<br>tests | Metabolic<br>Syndrome;<br>Glucose<br>intolerance<br>(mmol/L);<br>Hypertension<br>(mmHg);<br>Dyslipidemia<br>(mmol/L) | Metabolic<br>Syndrome: waist<br>circumference ( $\geq$<br>94 cm in men; $\geq$ 80<br>cm in women) or<br>body mass index ( $\geq$<br>30 kg/m <sup>2</sup> ) and 2 of<br>the following 4<br>criteria to be<br>fulfilled:<br>triglycerides ( $>$ 1.7<br>mmol/L), HDL-C<br>( $<$ 1.03 mmol/L in<br>men; $<$ 1.29<br>mmol/L in<br>women;), blood<br>pressure (systolic $\geq$<br>130 mmHg or<br>diastolic $\geq$ 85<br>mmHg), and fasting<br>plasma glucose ( $\geq$<br>5.6 mmol/L<br>Glucose<br>intolerance: raised<br>fasting plasma<br>glucose ( $\geq$ 5.6<br>mmol/L<br><br>Hypertension:<br>systolic $\geq$ 130<br>mmHg or diastolic<br>$\geq$ 85 mmHg<br><br>Dyslipidemia:<br>triglycerides $>$ 1.7<br>mmol/L lipoprotein | 4004 |
|----------------------------|------|---------|---------------|------------------------------------------|----------------------------|------------------------|-------------------------|----------------------|----------------------------------------------------------------------------------------------------------------------|----------------------------------------------------------------------------------------------------------------------------------------------------------------------------------------------------------------------------------------------------------------------------------------------------------------------------------------------------------------------------------------------------------------------------------------------------------------------------------------------------------------------------------------------------------------------------------------------------------------------------------------------------------------------------------------------------------------------------|------|

|                       |      |           |             |                                                                                                                          |                                                          |                                    |                                                                                                                                                                          |                   |                     |                                                                                                                                                                                                                                                                                                   |      |
|-----------------------|------|-----------|-------------|--------------------------------------------------------------------------------------------------------------------------|----------------------------------------------------------|------------------------------------|--------------------------------------------------------------------------------------------------------------------------------------------------------------------------|-------------------|---------------------|---------------------------------------------------------------------------------------------------------------------------------------------------------------------------------------------------------------------------------------------------------------------------------------------------|------|
| Khuc <sup>78</sup>    | 2012 | Chile     | Pros. Obs.  | Adolescent Metabolic Syndrome Risk Is Increased with Higher Infancy Weight Gain and Decreased with Longer Breast Feeding | Infant anthropometrics; Feeding patterns                 | Early infancy (<2 yr)              | Weight change; Breastfeeding                                                                                                                                             | Biochemical tests | Metabolic Syndrome  | cholesterol (< 1.03 mmol/L in men; < 1.29 mmol/L in women; Waist circumference ≥ 94cm boys, ≥ 80 cm girls, plus two of the following: triglycerides ≥ 1.7 mmol/L, HDL < 40 mg/dL in boys and <50 mg/dL in girls, systolic BP ≥ 130 or diastolic BP ≥ 85 mmHg, fasting plasma glucose ≥ 100 mg/dL. | 357  |
| Kuciene <sup>63</sup> | 2022 | Lithuania | Retro. Obs. | Prevalence and Risk Factors of HBP in 12-15-Year-Old Lithuanian Children and Adolescents                                 | Physical; Pregnancy complications; Birth anthropometrics | Preconception; Pregnancy and birth | Anthropometrics (Obesity); Pregnancy hypertension: Birth weight; Birth length; Gestational age; Adverse birth outcomes (preterm birth, small-/large-for-gestational age, | Medical reports   | Hypertension (mmHg) | Systolic blood pressure or diastolic blood pressure ≥ 95th percentile                                                                                                                                                                                                                             | 4819 |

|                                 |      |        |             |                                                                                                                                                                                        |                                                                                                                          |                                            |                                                                                                                                                                                                                |                                    |                     |                                                                                                            |        |
|---------------------------------|------|--------|-------------|----------------------------------------------------------------------------------------------------------------------------------------------------------------------------------------|--------------------------------------------------------------------------------------------------------------------------|--------------------------------------------|----------------------------------------------------------------------------------------------------------------------------------------------------------------------------------------------------------------|------------------------------------|---------------------|------------------------------------------------------------------------------------------------------------|--------|
| Leybovitz-Halelua <sup>81</sup> | 2018 | Israel | Retro. Obs. | Maternal gestational diabetes mellitus and the risk of subsequent pediatric cardiovascular diseases of the offspring: a population-based cohort study with up to 18 years of follow-up | Sociodemographics; Physicals; Pregnancy complications                                                                    | Pregnancy and birth                        | low/high birthweight);<br>Age; Anthropometrics (Parents obesity); Pregnancy hypertension; Gestational diabetes; Pre-eclampsia                                                                                  | Medical reports; Biochemical tests | Metabolic Syndrome  | Cardiovascular-related morbidities included hospitalizations involving a pre-defined set of ICD-9 codes    | 216197 |
| Liang <sup>64</sup>             | 2020 | China  | Retro. Obs. | Prevalence and risk factors of childhood hypertension from birth through childhood: a retrospective cohort study                                                                       | Sociodemographics; Lifestyle; Physical; Environmental; Pregnancy complications; Birth anthropometrics; Feeding patterns; | Pregnancy and birth; Early infancy (<2 yr) | Education; Income; Employment; Marital status; Other: Living with grandparents, Other: Rural, urban or suburban area; medical insurance; Diet; Physical activity; Anthropometrics (Parents obesity); Pregnancy | Self-reported                      | Hypertension (mmHg) | Systolic blood pressure and/or diastolic blood pressure $\geq$ 95th percentile for age, gender, and height | 17007  |



|                            |      |                              |             |                                                                          |                         |                     |                                                                                                                                                          |                                |                               |                                                                                                               |      |
|----------------------------|------|------------------------------|-------------|--------------------------------------------------------------------------|-------------------------|---------------------|----------------------------------------------------------------------------------------------------------------------------------------------------------|--------------------------------|-------------------------------|---------------------------------------------------------------------------------------------------------------|------|
| Longo-Mbenza <sup>65</sup> | 1999 | Democratic Republic of Congo | Retro. Obs. | Low birth weight and risk of hypertension in African school children     | Birth anthropometrics   | Pregnancy and birth | hypertension; Birthweight; Breastfeeding<br>Birthweight; Adverse birth outcomes (preterm birth, small-/large-for-gestational age, low/high birthweight); | Self-reported; Medical reports | Hypertension (mmHg)           | Blood pressure > mean +2 standard deviation                                                                   | 2409 |
| Lowe <sup>25</sup>         | 2019 | USA                          | Pros. Obs.  | Hyperglycemia and Adverse Pregnancy Outcome Follow-up Study (HAPO FUS)   | Pregnancy complications | Pregnancy and birth | Gestational diabetes                                                                                                                                     | Medical reports                | Glucose intolerance (mmol/L); | Glucose intolerance: test 2-h glucose 7.8-11.0 mmol/L                                                         | 4160 |
| Lu <sup>49</sup>           | 2019 | China                        | Pros. Obs.  | Maternal Gestational Diabetes Is Associated with Offspring Hypertension  | Pregnancy complications | Pregnancy and birth | Gestational diabetes                                                                                                                                     | Self-reported; Medical reports | Hypertension (mmHg)           | Systolic blood pressure and/or diastolic blood pressure ≥95th percentile                                      | 1156 |
| Mardones <sup>83</sup>     | 2012 | Chile                        | Retro. Obs. | Prenatal growth and metabolic syndrome components among Chilean children | Birth anthropometrics   | Pregnancy and birth | Birth weight; Birth length; Gestational age                                                                                                              | Self-reported                  | Metabolic Syndrome            | WC > 90th percentile; BP, SBP or DBP > 90th percentile; HDL-C < 40 mg/dl; TG > 110 mg/dl and GLU > 100 mg/dl. | 3521 |

|                          |      |             |             |                                                                                                                        |                                                                          |                                            |                                                                                                                  |                 |                    |                                                                                                                                                                                                                                                                        |        |
|--------------------------|------|-------------|-------------|------------------------------------------------------------------------------------------------------------------------|--------------------------------------------------------------------------|--------------------------------------------|------------------------------------------------------------------------------------------------------------------|-----------------|--------------------|------------------------------------------------------------------------------------------------------------------------------------------------------------------------------------------------------------------------------------------------------------------------|--------|
| Mardones <sup>82</sup>   | 2014 | Chile       | Retro. Obs. | Associations of Prenatal growth with metabolic syndrome, insulin resistance and nutritional status in Chilean children | Birth anthropometrics                                                    | Pregnancy and birth                        | Birth weight; Birth length; Gestational age                                                                      | Self-reported   | Metabolic Syndrome | 3 out of 5 of the following cut-off points: WC $\geq$ 90th percentile, SBP or DBP $\geq$ 90th percentile, low HDL-C $\leq$ 40 mg/dL, TG $\geq$ 110 mg/dL, and glucose $\geq$ 100 mg/dL.                                                                                | 3290   |
| Marinkovic <sup>79</sup> | 2017 | Netherlands | Pros. Obs.  | The Generation R study                                                                                                 | Infant anthropometrics                                                   | Early infancy (<2 yr)                      | Weight change; BMI change                                                                                        | Medical reports | Metabolic Syndrome | 3 or more of the following components: android fat mass $\geq$ 75th percentile; systolic or diastolic blood pressure $\geq$ 75th percentile, HDL cholesterol $\leq$ 25th percentile or triglycerides $\geq$ 75th percentile, and insulin level $\geq$ 75th percentile. | 4649   |
| Martens <sup>88</sup>    | 2016 | Canada      | Retro. Obs. | "Breastfeeding Initiation Associated With Reduced Incidence of Diabetes in Mothers                                     | Sociodemographic; Environmental; Birth anthropometrics; Feeding patterns | Pregnancy and birth; Early infancy (<2 yr) | Income; Parity; Other: Rural residence; Adverse birth outcomes (preterm birth, small-/large-for-gestational age, | Medical reports | Type 2 Diabetes    | Diabetes onset was considered as the date of the first diagnosis, according to the International                                                                                                                                                                       | 250392 |

|                         |      |             |                    | and Offspring"                                                                                                                        |                       |                                    | low/high birthweight); Breastfeeding                                         |                                  |                                                   | Classification of Diseases (ICD)                                                                                                                                                                                                            |      |
|-------------------------|------|-------------|--------------------|---------------------------------------------------------------------------------------------------------------------------------------|-----------------------|------------------------------------|------------------------------------------------------------------------------|----------------------------------|---------------------------------------------------|---------------------------------------------------------------------------------------------------------------------------------------------------------------------------------------------------------------------------------------------|------|
| Martens <sup>50</sup>   | 2022 | Belgium     | Pros. Obs.         | Environmental Influence on Aging in Early Life study (ENVIRONAGE)                                                                     | Cord blood biomarkers | Pregnancy and birth                | Other: Telomere length                                                       | Biochemical tests                | Hypertension (mmHg)                               | Systolic blood pressure or diastolic blood pressure > 90th percentile                                                                                                                                                                       | 485  |
| Mispirota <sup>36</sup> | 2017 | Perú        | Intervention Study | Effect of maternal zinc supplementation on the cardiometabolic profile of Peruvian children: results from a randomized clinical trial | Lifestyle             | Pregnancy and birth                | Diet: zinc supplementation                                                   | Medical reports                  | Glucose intolerance (mmol/L); Hypertension (mmHg) | Glucose intolerance: glucose level > 5.6 mmol/L<br>Hypertension: Systolic blood pressure or diastolic blood pressure > 90th percentile                                                                                                      | 195  |
| Monassero <sup>80</sup> | 2021 | Netherlands | Pros. Obs.         | Generation R study                                                                                                                    | Cord blood biomarkers | Preconception; Pregnancy and birth | Other: plasma folate concentrations, serum vitamin B-12, plasma homocysteine | Self-reported; Biochemical tests | Metabolic Syndrome                                | 3 of the following 4 risk factors: android fat mass percentage > 75th percentile, systolic or diastolic blood pressure or both > 75th percentile, HDL cholesterol < 25th percentile or triglycerides > 75th percentile or both, and insulin | 4449 |

|                       |      |        |            |                                                                                                  |                                                                      |                                            |                                                                             |                                  |                     |                                                                                                                                                                                |     |
|-----------------------|------|--------|------------|--------------------------------------------------------------------------------------------------|----------------------------------------------------------------------|--------------------------------------------|-----------------------------------------------------------------------------|----------------------------------|---------------------|--------------------------------------------------------------------------------------------------------------------------------------------------------------------------------|-----|
| Ni <sup>51</sup>      | 2021 | USA    | Pros. Obs. | Conditions Affecting Neurocognitive Development and Learning in Early Childhood (CANDLE) study   | Sociodemographic; Lifestyle; Cord blood biomarkers; Feeding patterns | Pregnancy and birth                        | Ethnicity; Smoking Diet; Other: plasma folate concentrations; Breastfeeding | Self-reported; Biochemical tests | Hypertension (mmHg) | concentration > 75th percentile<br>Systolic blood pressure and/or diastolic blood pressure $\geq$ 90th percentile                                                              | 846 |
| Pereira <sup>52</sup> | 2010 | Brazil | Pros. Obs. | The influence of birthweight on arterial blood pressure of children                              | Birth anthropometrics                                                | Pregnancy and birth                        | Birthweight                                                                 | Medical reports                  | Hypertension        | Systolic blood pressure or diastolic blood pressure $\geq$ 95th percentile for gender, age and height                                                                          | 472 |
| Pettitt <sup>38</sup> | 1991 | USA    | Pros. Obs. | Abnormal glucose tolerance during pregnancy in Pima Indian women. Long-term effects on offspring | Pregnancy complications                                              | Pregnancy and birth                        | Other: Hyperglycemia                                                        | Biochemical tests                | Type 2 Diabetes     | Type 2 diabetes: 2-h postload plasma glucose concentration of > 11.1 mM and impaired glucose tolerance by a 2-h postload plasma glucose concentration of > 7.8 mM but <11.1 mM | 552 |
| Pettitt <sup>86</sup> | 1998 | USA    | Pros. Obs. | Long-term effects of the intrauterine                                                            | Pregnancy complications; Birth                                       | Pregnancy and birth; Early infancy (<2 yr) | Gestational diabetes; Other: Hyperglycemia;                                 | Self-reported;                   | Type 2 Diabetes     | Glucose $\geq$ 11.1 mmol/l 2h after                                                                                                                                            | 595 |

|                         |      |                                |            |                                                                  |                                                    |                                            |                                                                                                                                                               |                   |                              |                                                                                                                                |      |
|-------------------------|------|--------------------------------|------------|------------------------------------------------------------------|----------------------------------------------------|--------------------------------------------|---------------------------------------------------------------------------------------------------------------------------------------------------------------|-------------------|------------------------------|--------------------------------------------------------------------------------------------------------------------------------|------|
|                         |      |                                |            | environment, birth weight, and breastfeeding in Pima Indians     | anthropometrics; Feeding patterns                  |                                            | Adverse birth outcomes (preterm birth, small-/large-for-gestational age, low/high birthweight); Breastfeeding                                                 | Biochemical tests |                              | ingestion of 75-g glucose load                                                                                                 |      |
| Scholten <sup>s26</sup> | 2019 | USA, Canada, Israel, UK, China | Pros. Obs. | "the Hyperglycemia and Adverse Pregnancy Outcome (HAPO) cohort." | Pregnancy complications                            | Pregnancy and birth                        | Other: Hyperglycemia                                                                                                                                          | Medical reports   | Glucose intolerance (mmol/L) | Impaired fasting glucose was defined as (IFG) (FPG 5.6-6.9 mmol/L or impaired glucose tolerance (IGT) (2-h PG 7.8-11.0 mmol/L) | 4160 |
| Shankaran <sup>54</sup> | 2006 | USA                            | Pros. Obs. | Maternal Lifestyle Study                                         | Sociodemographic; Lifestyle; Birth anthropometrics | Pregnancy and birth                        | Ethnicity; Education; Alcohol consumption; Smoking Drug abuse; Adverse birth outcomes (preterm birth, small-/large-for-gestational age, low/high birthweight) | Medical reports   | Hypertension (mmHg)          | Systolic blood pressure or diastolic blood pressure > 95th percentile for age, height and sex                                  | 950  |
| Shankaran <sup>53</sup> | 2010 | USA                            | Pros. Obs. | (Maternal Lifestyle Study, MLS)                                  | Lifestyle; Physical: Infant anthropometrics        | Pregnancy and birth; Early infancy (<2 yr) | Anthropometrics; Maternal weight; Alcohol consumption;                                                                                                        | Medical reports   | Hypertension (mmHg)          | Systolic blood pressure and/or diastolic blood pressure ≥ 95th                                                                 | 880  |

|                         |      |       |                       |                                                                                                                |                          |                     |                                              |                                       |                                                                                                       |                                                                                                                                                                                                                                                                                             |      |
|-------------------------|------|-------|-----------------------|----------------------------------------------------------------------------------------------------------------|--------------------------|---------------------|----------------------------------------------|---------------------------------------|-------------------------------------------------------------------------------------------------------|---------------------------------------------------------------------------------------------------------------------------------------------------------------------------------------------------------------------------------------------------------------------------------------------|------|
|                         |      |       |                       |                                                                                                                |                          |                     | Drug abuse;<br>Weight change                 |                                       |                                                                                                       | percentile for age,<br>height and sex                                                                                                                                                                                                                                                       |      |
| Silverman <sup>27</sup> | 1995 | USA   | Pros.<br>Obs.         | Impaired glucose tolerance in adolescent offspring of diabetic mothers - relationship to fetal hyperinsulinism | Pregnancy complications; | Pregnancy and birth | Gestational diabetes                         | Medical reports;<br>Biochemical tests | Glucose intolerance (mmol/L);<br>Type 2 Diabetes (mmol/L)                                             | Glucose intolerance: impaired glucose tolerance (IGT) is defined as a 2-h glucose concentration > 7.8 mmol/L<br><br>Type 2 diabetes: random glucose concentration > 11.1 mmol/L or fasting glucose concentration > 7.8mmol/L with a 2-h and intervening glucose concentration ≥ 11.1 mmol/L | 168  |
| Stewart <sup>37</sup>   | 2009 | Nepal | Intervention<br>Study | Antenatal micronutrient supplementation reduces metabolic syndrome in 6- to 8-year-old children in rural Nepal | Lifestyle                | Pregnancy and birth | Diet: maternal micronutrient supplementation | Medical reports                       | Metabolic Syndrome;<br>Glucose intolerance (mmol/L);<br>Hypertension (mmHg);<br>Dyslipidemia (mmol/L) | Metabolic Syndrome:<br><br>3 of the following criteria:<br><br>plasma glucose ≥ 85th percentile of the study population, because few of the children had a glucose concentration                                                                                                            | 3524 |

above the  
traditionally  
recommended  
cutpoint of 5.6  
mmol/L;

plasma HDL  
cholesterol < 0.9  
mmol/L; plasma  
triglycerides  $\geq$  1.7  
mmol/L;

SBP or DBP > 90th  
percentile;

waist  
circumference  $\geq$   
85th percentile

Glucose  
intolerance:  
Glucose  $\geq$  85th  
percentile

Hypertension:  
Systolic blood  
pressure or  
diastolic blood  
pressure  $\geq$  90th  
percentile

Dyslipidemia: Low  
HDL cholesterol <  
0,9 mmol/l or high  
triglycerides  $\geq$  1,7  
mmol/L

|                   |      |       |            |                                                                                                   |                                                                                         |                     |                                                             |                 |                                                                                                      |                                                                                                                                                                                                                                                                                                                                                                                                                                                           |       |
|-------------------|------|-------|------------|---------------------------------------------------------------------------------------------------|-----------------------------------------------------------------------------------------|---------------------|-------------------------------------------------------------|-----------------|------------------------------------------------------------------------------------------------------|-----------------------------------------------------------------------------------------------------------------------------------------------------------------------------------------------------------------------------------------------------------------------------------------------------------------------------------------------------------------------------------------------------------------------------------------------------------|-------|
| Sun <sup>28</sup> | 2018 | USA   | Pros. Obs. | National Health and Nutrition Examination Survey                                                  | Sociodemographic; Birth anthropometrics                                                 | Pregnancy and birth | Ethnicity; Birthweight                                      | Self-reported   | Glucose intolerance (mg/dL <sup>-1</sup> ); Hypertension (mmHg); Dyslipidemia (mg/dL <sup>-1</sup> ) | Glucose intolerance: defined as high FBG (>100 mg/dL <sup>-1</sup> ) and high HbA1c (> 5.7%)<br><br>Hypertension: Systolic blood pressure or diastolic blood pressure > 95th percentile for age, gender and height<br><br>Dyslipidemia: high triglyceride (>150 mg/dL <sup>-1</sup> ), high total cholesterol (> 200 mg/dL <sup>-1</sup> ), low HDL-C (35 mg/dL <sup>-1</sup> ) or high low-density lipoprotein cholesterol (> 130 mg/dL <sup>-1</sup> ). | 28153 |
| Tam <sup>30</sup> | 2008 | China | Pros. Obs. | Glucose Intolerance and Cardiometabolic Risk in Children Exposed to Maternal Gestational Diabetes | Sociodemographic; Cord blood biomarkers; Birth anthropometrics; Pregnancy complications | Pregnancy and birth | Gestational diabetes; umbilical cord insulin level at birth | Medical reports | Glucose intolerance (mmol/L); Type 2 Diabetes (mmol/L)                                               | Glucose intolerance: a fasting PG level of 7.0 mmol/L or a 2-hour PG level of 11.1 mmol/L; IGT was defined as a fasting PG level of                                                                                                                                                                                                                                                                                                                       | 164   |



Mellitus in Utero

7.0 mmol/L and a 2-hour PG level of 7.8 and 11.1 mmol/L; and impaired fasting PG level was defined as a fasting PG level of 5.6 mmol/L and < 7.0 mmol/L.

Type 2 diabetes: a fasting PG level of  $\geq 7.0$  mmol/L or a 2-hour PG level of  $\geq 11.1$  mmol/L; IGT was defined as a fasting PG level of < 7.0 mmol/L and a 2-hour PG level of

$\geq 7.8$  and < 11.1 mmol/L; and impaired fasting PG level was defined as a fasting PG level of  $\geq 5.6$  mmol/L and < 7.0 mmol/L

|                   |      |       |            |                                                             |                         |                     |                         |                 |                    |                                                                     |     |
|-------------------|------|-------|------------|-------------------------------------------------------------|-------------------------|---------------------|-------------------------|-----------------|--------------------|---------------------------------------------------------------------|-----|
| Tam <sup>31</sup> | 2010 | China | Pros. Obs. | Glucose Intolerance and Cardiometabolic Risk in Adolescents | Pregnancy complications | Pregnancy and birth | Other: Hyperinsulinemia | Medical reports | Metabolic Syndrome | Waist circumference $\geq$ age and sex-specific 90th percentile and | 129 |
|-------------------|------|-------|------------|-------------------------------------------------------------|-------------------------|---------------------|-------------------------|-----------------|--------------------|---------------------------------------------------------------------|-----|

|                     |      |       |            |                                                                    |                         |                      |                                                |                   |                                                   |                                                                                                                                                                                                                                                                                                                                                                   |     |
|---------------------|------|-------|------------|--------------------------------------------------------------------|-------------------------|----------------------|------------------------------------------------|-------------------|---------------------------------------------------|-------------------------------------------------------------------------------------------------------------------------------------------------------------------------------------------------------------------------------------------------------------------------------------------------------------------------------------------------------------------|-----|
|                     |      |       |            | Exposed to Maternal Gestational Diabetes A 15-year follow-up study |                         |                      |                                                |                   |                                                   | Blood pressure $\geq$ 90 percentile age and sex                                                                                                                                                                                                                                                                                                                   |     |
| Tam <sup>29</sup>   | 2017 | China | Pros. Obs. | Hyperglycemia and adverse pregnancy outcome study                  | Pregnancy complications | Pregnancy and birth  | Gestational diabetes                           | Medical reports   | Glucose intolerance (mmol/L); Hypertension (mmHg) | Glucose intolerance: the presence of impaired glucose tolerance, impaired fasting glucose or diabetes mellitus<br><br>Hypertension: according to age, sex and height specific reference ranges from the National High Blood Pressure Education Program working group on high blood pressure in children and adolescents (Pediatrics 2004; 114(Suppl 2): 555-576). | 870 |
| Valvi <sup>55</sup> | 2015 | Spain | Pros. Obs. | Infancia y Medio Ambiente"—Environment                             | Environmental           | Pregnancy and birth; | Endocrine-disrupting chemicals exposure (PFAS, | Biochemical tests | Hypertension (mmHg)                               | Systolic blood pressure and diastolic blood pressure are defined as a BP z-                                                                                                                                                                                                                                                                                       | 391 |

|                            |      |     |            |                                                                                             |                                                                  |                     |                                    |                             |               |                                                 |                                                                                                                                                                                                                                                                                                                                                                                                                                                                                                               |     |
|----------------------------|------|-----|------------|---------------------------------------------------------------------------------------------|------------------------------------------------------------------|---------------------|------------------------------------|-----------------------------|---------------|-------------------------------------------------|---------------------------------------------------------------------------------------------------------------------------------------------------------------------------------------------------------------------------------------------------------------------------------------------------------------------------------------------------------------------------------------------------------------------------------------------------------------------------------------------------------------|-----|
| Vandyo usefi <sup>33</sup> | 2019 | USA | Pros. Obs. | and Childhood (INMA)<br>The Study of Latino Adolescents at Risk for Diabetes cohort (SOLAR) | Birth anthropometrics; Pregnancy complications; Feeding patterns | Pregnancy and birth | Birth weight; Gestational diabetes | phthalates, bisphenols etc) | Self-reported | Metabolic Syndrome; Glucose intolerance (mg/dL) | score $\geq$ 90th percentile<br>Metabolic Syndrome: at least three of the following risk factors: abdominal obesity (WC $\geq$ 90th percentile for age, sex), SBP and $>$ 90th percentile adjusted for height, age, and sex), (HDL cholesterol $\leq$ 10th for age and sex), hypertriglyceridemia (TG $\geq$ 90th percentile of age and sex).<br>Glucose intolerance: FPG levels between 100 and 125 mg/dL (between 5.6 and 6.9 mmol/L) and/or IGT, 2-hour plasma glucose value of at least 140 and less than | 229 |
|----------------------------|------|-----|------------|---------------------------------------------------------------------------------------------|------------------------------------------------------------------|---------------------|------------------------------------|-----------------------------|---------------|-------------------------------------------------|---------------------------------------------------------------------------------------------------------------------------------------------------------------------------------------------------------------------------------------------------------------------------------------------------------------------------------------------------------------------------------------------------------------------------------------------------------------------------------------------------------------|-----|

|                         |      |        |                |                                                                                                                                       |                                                                                          |                      |                                                                                                                                         |                 |                         |                                                                                                   |                   |
|-------------------------|------|--------|----------------|---------------------------------------------------------------------------------------------------------------------------------------|------------------------------------------------------------------------------------------|----------------------|-----------------------------------------------------------------------------------------------------------------------------------------|-----------------|-------------------------|---------------------------------------------------------------------------------------------------|-------------------|
|                         |      |        |                |                                                                                                                                       |                                                                                          |                      |                                                                                                                                         |                 |                         | 200 mg/dL, and/or HbA1c values between 5.7 and 6.4% (39-47 mmol/mol).                             |                   |
| Vashisht <sup>a56</sup> | 2017 | USA    | Pros. Obs.     | Association among prematurity (<30 weeks gestational age), blood pressure, urinary albumin, calcium, and phosphate in early childhood | Birth anthropometrics                                                                    | Pregnancy and birth; | Gestational age at birth; Adverse birth outcomes (preterm birth, small-/large-for-gestational age, low/high birthweight)                | Medical reports | Hypertension (mmHg)     | Systolic blood pressure and diastolic blood pressure > 95th percentiles for age and sex           | 106               |
| Vohr <sup>57</sup>      | 2010 | USA    | Pros. Obs.     | Multicenter Indomethacin IntraVentricular Haemorrhage Prevention Trial                                                                | Sociodemographic; Pregnancy complications; Birth anthropometrics; Infant anthropometrics | Pregnancy and birth  | Ethnicity; Pre-eclampsia; Adverse birth outcomes (preterm birth, small-/large-for-gestational age, low/high birthweight); Weight change | Medical reports | Hypertension (mmHg)     | Systolic blood pressure and diastolic blood pressure ≥ 95th percentile for age, gender and height | 296 (95 controls) |
| Wei <sup>89</sup>       | 2003 | Taiwan | Registry Study | Low birth weight and high birth weight infants are both at an increased risk to have type 2 diabetes                                  | Sociodemographic; Birth anthropometrics                                                  | Pregnancy and birth  | Socioeconomic status; Adverse birth outcomes (preterm birth, small-/large-for-gestational age,                                          | Medical reports | Type 2 Diabetes (mg/dL) | FPG 126 mg/dL at screening.                                                                       | 978               |

|                       |      |        |             |                                                                                                |                          |                       |                                                                                                |                 |                              |                                                                                                                                                                                                                                                       |      |
|-----------------------|------|--------|-------------|------------------------------------------------------------------------------------------------|--------------------------|-----------------------|------------------------------------------------------------------------------------------------|-----------------|------------------------------|-------------------------------------------------------------------------------------------------------------------------------------------------------------------------------------------------------------------------------------------------------|------|
|                       |      |        |             | among schoolchildren in Taiwan                                                                 |                          |                       | low/high birthweight)                                                                          |                 |                              |                                                                                                                                                                                                                                                       |      |
| Wu <sup>34</sup>      | 2019 | China  | Pros. Obs.  | Beijing Children and Adolescents Metabolic Syndrome Study (BCAMS Study)                        | Birth anthropometrics    | Pregnancy and birth   | Adverse birth outcomes (preterm birth, small-/large-for-gestational age, low/high birthweight) | Self-reported   | Glucose intolerance (mmol/L) | HOMA-IR > 2,3 and impaired fasting glucose was defined as fasting blood glucose $\geq$ 5.6 mmol/L                                                                                                                                                     | 2935 |
| Xu <sup>67</sup>      | 2020 | China  | Retro. Obs. | The Seven Northeastern Cities (SNEC) study                                                     | Lifestyle; Environmental | Pregnancy and birth;  | Smoking; Other: Pet-ownership                                                                  | Self-reported   | Hypertension (mmHg)          | Mean Systolic blood pressure and diastolic blood pressure $\geq$ 95th percentile for age, height and sex                                                                                                                                              | 9354 |
| Yakubov <sup>84</sup> | 2015 | Israel | Retro. Obs. | The Duration of Breastfeeding and Its Association with Metabolic Syndrome among Obese Children | Feeding patterns         | Early infancy (<2 yr) | Breastfeeding duration                                                                         | Medical reports | Metabolic Syndrome           | 3 out of 5 criteria: BMI $\geq$ 95th percentile for age and sex, hypertriglyceridemia (> 120 mg/dL), high blood pressure (> 95th percentile for age, sex, and height), high blood fasting glucose level (> 100 mg/dL), and low HDL level (< 45 mg/dL) | 123  |

|                       |      |        |                       |                                                                                                       |                                                                  |                                                |                                                                                                                                                               |                                |                                  |                                                                                                                                                |                  |
|-----------------------|------|--------|-----------------------|-------------------------------------------------------------------------------------------------------|------------------------------------------------------------------|------------------------------------------------|---------------------------------------------------------------------------------------------------------------------------------------------------------------|--------------------------------|----------------------------------|------------------------------------------------------------------------------------------------------------------------------------------------|------------------|
| Yang <sup>39</sup>    | 2021 | China  | Cross-sectional study | Tianjin Gestational Diabetes Mellitus Prevention Program                                              | Pregnancy complications                                          | Preconception; Pregnancy and birth             | Gestational diabetes                                                                                                                                          | Biochemical tests              | Dyslipidemia (mmol/L)            | Cholesterol $\geq$ 5.18 mmol/L, LDL-C $>$ 3.37 mmol/L, HDL-C $<$ 1.04 mmol/L, non-HDL_C $\geq$ 3.76 mmol/L or triglycerides $\geq$ 1.13 mmol/L | 1144             |
| Young <sup>85</sup>   | 2002 | Canada | Cross-sectional study | Type 2 diabetes mellitus in children - Prenatal and early infancy risk factors among native Canadians | Pregnancy complications; Birth anthropometrics; Feeding patterns | Pregnancy and birth; Early infancy ( $<$ 2 yr) | Gestational diabetes; Adverse birth outcomes (preterm birth, small-/large-for-gestational age, low/high birthweight); Breastfeeding duration ( $>$ 12 months) | Self-reported; Medical reports | Type 2 Diabetes (mg/L; mmol/L)   | Fasting plasma glucose $\geq$ 126 mg/dL (7.0 mmol/L)                                                                                           | 46 (92 controls) |
| Zarrati <sup>68</sup> | 2013 | Iran   | Retro. Obs.           | Does low birth weight predict hypertension and obesity in schoolchildren?                             | Birth anthropometrics; Feeding patterns                          | Pregnancy and birth                            | Birthweight; Adverse birth outcomes (preterm birth, small-/large-for-gestational age, low/high birthweight)                                                   | Self-reported; Medical reports | Hypertension (mmHg)              | Systolic blood pressure or diastolic blood pressure $\geq$ 95th percentile for age, height and sex                                             | 1184             |
| Zhou <sup>58</sup>    | 2019 | China  | Pros. Obs.            | Association of elective cesare                                                                        | Birth anthropometrics                                            | Pregnancy and birth                            | Mode of delivery                                                                                                                                              | Medical reports                | Metabolic Syndrome; Hypertension | Fasting triglycerides 1.1 mmol/L, HDL-C $<$ 1.3 mmol/L, fasting                                                                                | 1467             |

an delivery with  
metabolic  
measures in  
childhood: A  
prospective  
cohort study in  
China

glucose  $\geq 6.1$   
mmol/L, waist  
circumference  $>$   
75th age- and sex,  
SBP or DBP  $>$  90th  
percentile for age,  
sex, and  
height. Another  
definition of MetS  
for prepubertal  
children aged 2-11  
years was further  
applied. According  
to this definition,  
hypertriglyceridemi  
a, high fasting  
glucose, central  
obesity, and  
hypertension were  
defined as the  
values  $>$  90th  
percentile and low  
HDL as the values  
 $<$  10th percentile.





A

## Glucose intolerance

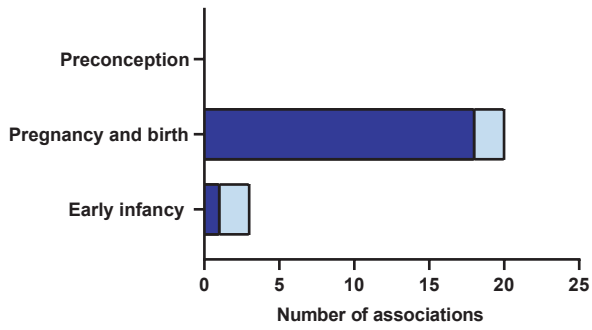

B

## Dyslipidemia

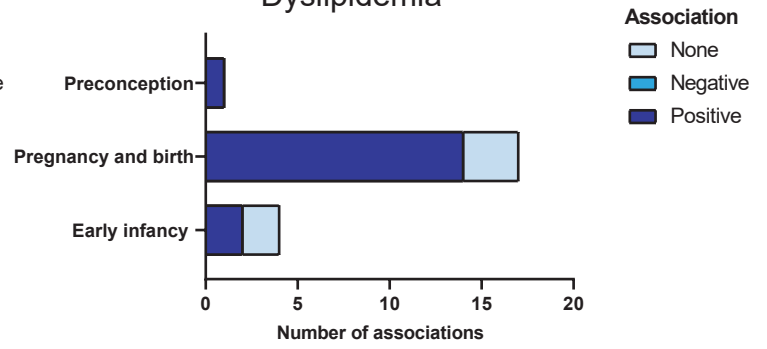

C

## Hypertension

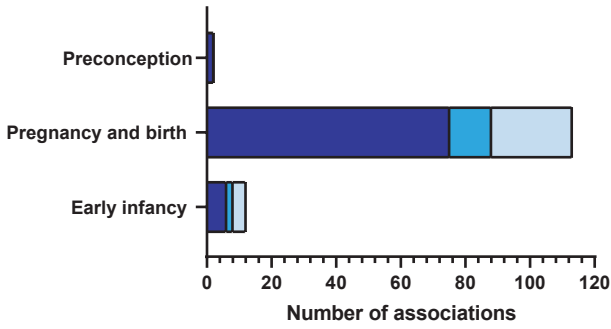

D

## Metabolic syndrome

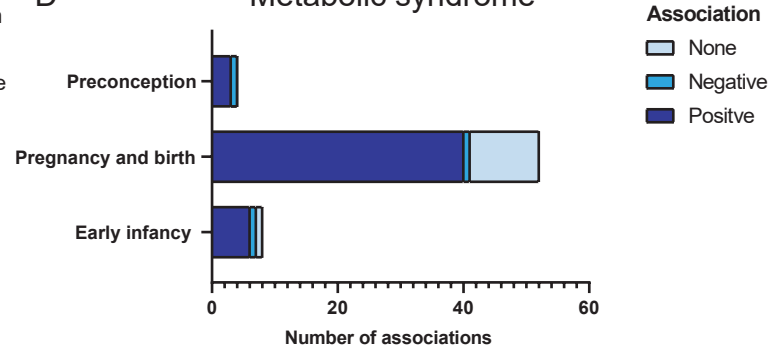

E

## Type 2 diabetes

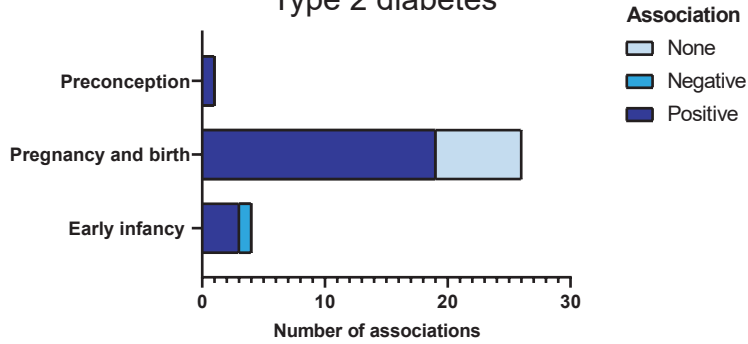

### A Physical prepregnancy

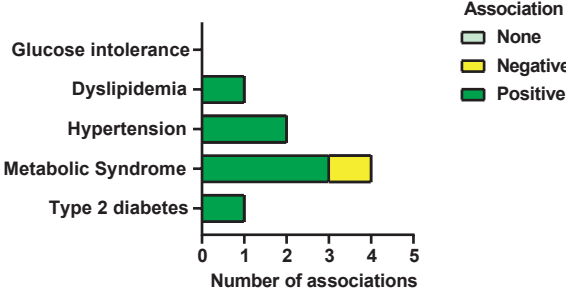

### B Birth anthropometrics

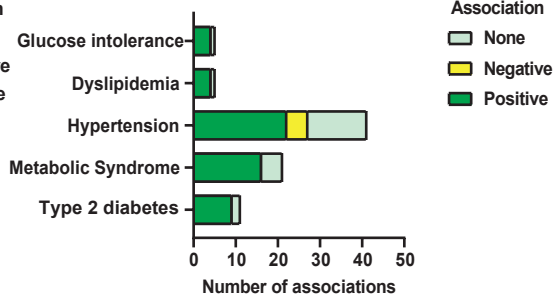

### C Sociodemographics

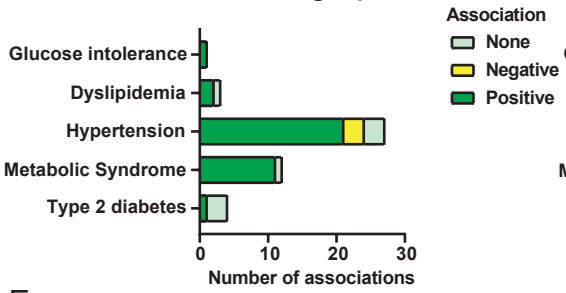

### D Pregnancy complications

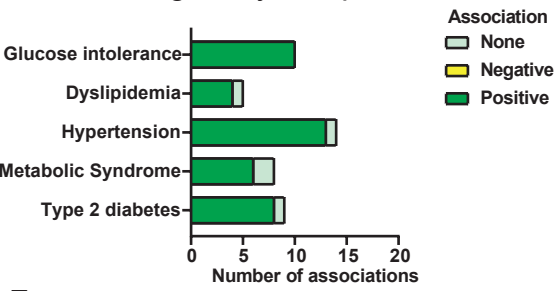

### E Cord blood biomarkers

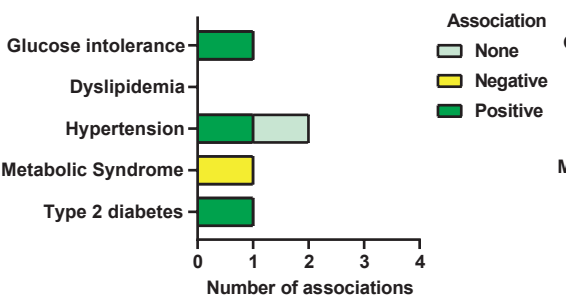

### F Lifestyle

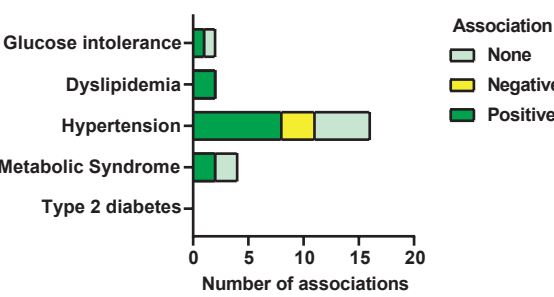

### G Physical pregnancy

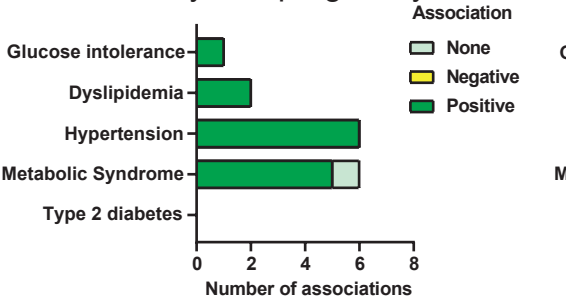

### H Environmental

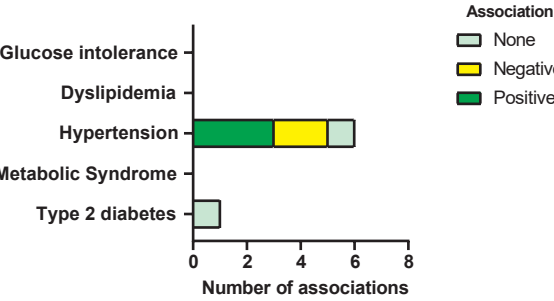

### I Infant anthropometrics

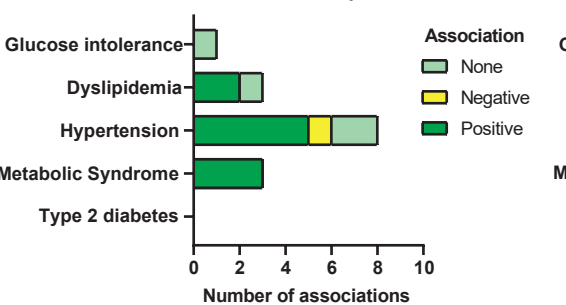

### J Feeding patterns

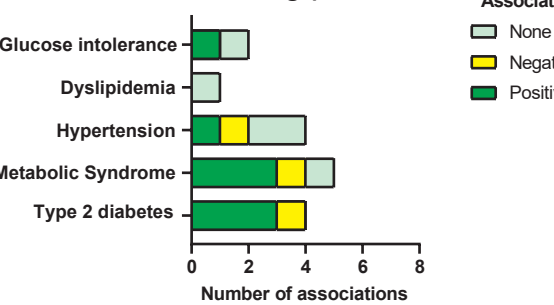

| Risk factor                                   | Methodological aspects                                                        |                      | Reflect/mark the study objective                                                                   | Modifiable               |                      | Prediction  |
|-----------------------------------------------|-------------------------------------------------------------------------------|----------------------|----------------------------------------------------------------------------------------------------|--------------------------|----------------------|-------------|
|                                               | Reproducibility, accuracy, standardization, stability and technical variation | Biological variation | A change in the marker is linked with a change in the endpoint in one or more target population(s) | Theoretically modifiable | Intervention studies |             |
| <b>Preconception</b>                          |                                                                               |                      |                                                                                                    |                          |                      |             |
| Maternal prepregnancy weight                  | Strong (++)                                                                   | Strong (++)          | Strong (++)                                                                                        | Medium (+)               | Low (0)              | Strong (++) |
| Paternal prepregnancy BMI                     | Medium (+)                                                                    | Medium (+)           | Medium (+)                                                                                         | Medium (+)               | Low (0)              | Medium (+)  |
| Pregestational diabetes                       | Medium (+)                                                                    | Medium (+)           | Medium (+)                                                                                         | Medium (+)               | Low (0)              | Medium (+)  |
| Concentrations of plasma folate               | Medium (+)                                                                    | Medium (+)           | Medium (+)                                                                                         | Medium (+)               | Low (0)              | Medium (+)  |
| Concentrations of serum B12                   | Medium (+)                                                                    | Medium (+)           | Medium (+)                                                                                         | Medium (+)               | Low (0)              | Medium (+)  |
| Concentrations of plasma homocysteine         | Medium (+)                                                                    | Medium (+)           | Low (0)                                                                                            | Medium (+)               | Low (0)              | Medium (+)  |
| <b>Pregnancy and birth</b>                    |                                                                               |                      |                                                                                                    |                          |                      |             |
| Birth weight                                  | Strong (++)                                                                   | Strong (++)          | Strong (++)                                                                                        | Low (0)                  | Low (0)              | Medium (+)  |
| Birth length                                  | Strong (++)                                                                   | Strong (++)          | Strong (++)                                                                                        | Low (0)                  | Low (0)              | Medium (+)  |
| Low birth weight/small-for-gestational age    | Strong (++)                                                                   | Strong (++)          | Strong (++)                                                                                        | Medium (+)               | Low (0)              | Medium (+)  |
| High birth weight/large-for-gestational age   | Strong (++)                                                                   | Strong (++)          | Strong (++)                                                                                        | Medium (+)               | Low (0)              | Medium (+)  |
| Gestational age at birth continuous           | Strong (++)                                                                   | Strong (++)          | Strong (++)                                                                                        | Medium (+)               | Low (0)              | Medium (+)  |
| Preterm birth                                 | Strong (++)                                                                   | Strong (++)          | Strong (++)                                                                                        | Medium (+)               | Low (0)              | Medium (+)  |
| Mode of Delivery                              | Strong (++)                                                                   | Strong (++)          | Strong (++)                                                                                        | Medium (+)               | Low (0)              | Medium (+)  |
| Gestational diabetes                          | Medium (+)                                                                    | Medium (+)           | Medium (+)                                                                                         | Medium (+)               | Low (0)              | Medium (+)  |
| Pregnancy hypertension                        | Medium (+)                                                                    | Medium (+)           | Medium (+)                                                                                         | Medium (+)               | Low (0)              | Medium (+)  |
| Preeclampsia                                  | Medium (+)                                                                    | Medium (+)           | Medium (+)                                                                                         | Medium (+)               | Low (0)              | Medium (+)  |
| Hyperglycemia                                 | Medium (+)                                                                    | Medium (+)           | Medium (+)                                                                                         | Medium (+)               | Low (0)              | Medium (+)  |
| Hyperinsulinemia                              | Medium (+)                                                                    | Medium (+)           | Medium (+)                                                                                         | Medium (+)               | Low (0)              | Medium (+)  |
| Cord blood biomarkers (telomere length)       | Medium (+)                                                                    | Low (0)              | Medium (+)                                                                                         | Medium (+)               | Low (0)              | Medium (+)  |
| Cord blood biomarkers (plasma folate)         | Medium (+)                                                                    | Low (0)              | Medium (+)                                                                                         | Medium (+)               | Low (0)              | Medium (+)  |
| Cord blood biomarkers (plasma B12)            | Medium (+)                                                                    | Low (0)              | Medium (+)                                                                                         | Medium (+)               | Low (0)              | Medium (+)  |
| Cord blood biomarkers (plasma homocysteine)   | Medium (+)                                                                    | Low (0)              | Medium (+)                                                                                         | Medium (+)               | Low (0)              | Medium (+)  |
| Cord blood biomarkers (insulin level)         | Medium (+)                                                                    | Low (0)              | Medium (+)                                                                                         | Medium (+)               | Low (0)              | Medium (+)  |
| Maternal age                                  | Strong (++)                                                                   | Medium (+)           | Medium (+)                                                                                         | Medium (+)               | Low (0)              | Medium (+)  |
| Maternal education                            | Strong (++)                                                                   | Medium (+)           | Medium (+)                                                                                         | Medium (+)               | Low (0)              | Medium (+)  |
| Paternal education                            | Strong (++)                                                                   | Medium (+)           | Medium (+)                                                                                         | Medium (+)               | Low (0)              | Medium (+)  |
| Income                                        | Strong (++)                                                                   | Medium (+)           | Medium (+)                                                                                         | Medium (+)               | Low (0)              | Medium (+)  |
| Parental social economic status               | Medium (+)                                                                    | Medium (+)           | Medium (+)                                                                                         | Medium (+)               | Low (0)              | Medium (+)  |
| Ethnicity                                     | Medium (+)                                                                    | Medium (+)           | Medium (+)                                                                                         | Medium (+)               | Low (0)              | Medium (+)  |
| Parity                                        | Strong (++)                                                                   | Medium (+)           | Low (0)                                                                                            | Medium (+)               | Low (0)              | Medium (+)  |
| Employment                                    | Medium (+)                                                                    | Medium (+)           | Medium (+)                                                                                         | Medium (+)               | Low (0)              | Medium (+)  |
| Relationship status                           | Medium (+)                                                                    | Medium (+)           | Low (0)                                                                                            | Medium (+)               | Low (0)              | Medium (+)  |
| Screen time                                   | Medium (+)                                                                    | Medium (+)           | Medium (+)                                                                                         | Medium (+)               | Low (0)              | Medium (+)  |
| Social network parents                        | Medium (+)                                                                    | Medium (+)           | Medium (+)                                                                                         | Medium (+)               | Low (0)              | Medium (+)  |
| Non-traditional family                        | Medium (+)                                                                    | Medium (+)           | Medium (+)                                                                                         | Medium (+)               | Low (0)              | Medium (+)  |
| Living with grandparents                      | Medium (+)                                                                    | Medium (+)           | Medium (+)                                                                                         | Medium (+)               | Low (0)              | Medium (+)  |
| Medical insurance                             | Medium (+)                                                                    | Medium (+)           | Medium (+)                                                                                         | Medium (+)               | Low (0)              | Medium (+)  |
| Maternal smoking                              | Medium (+)                                                                    | Medium (+)           | Medium (+)                                                                                         | Medium (+)               | Low (0)              | Medium (+)  |
| Maternal drugs                                | Medium (+)                                                                    | Medium (+)           | Medium (+)                                                                                         | Medium (+)               | Low (0)              | Medium (+)  |
| Diet                                          | Medium (+)                                                                    | Medium (+)           | Medium (+)                                                                                         | Medium (+)               | Low (0)              | Medium (+)  |
| Physical activity                             | Medium (+)                                                                    | Medium (+)           | Medium (+)                                                                                         | Medium (+)               | Low (0)              | Medium (+)  |
| Anthropometrics                               | Strong (++)                                                                   | Medium (+)           | Medium (+)                                                                                         | Medium (+)               | Low (0)              | Medium (+)  |
| Parental BMI                                  | Strong (++)                                                                   | Medium (+)           | Medium (+)                                                                                         | Medium (+)               | Low (0)              | Medium (+)  |
| Gestational weight gain continuous            | Strong (++)                                                                   | Medium (+)           | Medium (+)                                                                                         | Medium (+)               | Low (0)              | Medium (+)  |
| Thyroid antibodies (TSH)                      | Medium (+)                                                                    | Medium (+)           | Medium (+)                                                                                         | Medium (+)               | Low (0)              | Medium (+)  |
| Thyroid antibodies (Ft4)                      | Medium (+)                                                                    | Medium (+)           | Medium (+)                                                                                         | Medium (+)               | Low (0)              | Medium (+)  |
| Thyroid antibodies (TPO-Abs)                  | Medium (+)                                                                    | Medium (+)           | Medium (+)                                                                                         | Medium (+)               | Low (0)              | Medium (+)  |
| Thyroid antibodies (thyroglobulin antibodies) | Medium (+)                                                                    | Medium (+)           | Medium (+)                                                                                         | Medium (+)               | Low (0)              | Medium (+)  |
| Environmental                                 | Medium (+)                                                                    | Medium (+)           | Medium (+)                                                                                         | Medium (+)               | Low (0)              | Medium (+)  |
| <b>Early infancy</b>                          |                                                                               |                      |                                                                                                    |                          |                      |             |
| Breastfeeding                                 | Strong (++)                                                                   | Medium (+)           | Medium (+)                                                                                         | Medium (+)               | Low (0)              | Medium (+)  |
| BMI/weight change/height change               | Strong (++)                                                                   | Medium (+)           | Medium (+)                                                                                         | Medium (+)               | Low (0)              | Medium (+)  |

■ Proven (+++)
   
■ Strong (++)
   
■ Medium (+)
   
■ Low (0)
